1 **RbAp46/48<sup>LIN-53</sup> and HAT-1 are required for initial CENP-A<sup>HCP-3</sup>**  
2 **deposition and *de novo* centromere formation in *Caenorhabditis***  
3 ***elegans* embryos**

4  
5 Zhongyang Lin<sup>1</sup> and Karen Wing Yee Yuen<sup>1\*</sup>

6 <sup>1</sup> School of biological sciences, the University of Hong Kong, Kadoorie Biological Sciences Building,  
7 Pokfulam Road, Hong Kong

8 \* To whom correspondence should be addressed. Tel: (852) 2299 0848; Fax:(852) 2559 9114; Email:  
9 [kwyyuen@hku.hk](mailto:kwyyuen@hku.hk)

10

11 **ABSTRACT**

12 Foreign DNA microinjected into the *Caenorhabditis elegans* germline forms episomal extra-  
13 chromosomal arrays, or artificial chromosomes (ACs), in embryos. Injected linear, short DNA  
14 fragments concatemerize into high molecular weight (HMW)-DNA arrays that are visible as punctate  
15 DAPI-stained foci in oocytes, which undergo chromatinization and centromerization in embryos. The  
16 inner centromere, inner and outer kinetochore components, including AIR-2, CENP-A<sup>HCP-3</sup>,  
17 Mis18BP1<sup>KNL-2</sup> and BUB-1, assemble onto the nascent ACs during the first mitosis. Yet, due to  
18 incomplete DNA replication of the nascent ACs, centromeric proteins are not oriented at the poleward  
19 faces of the nascent ACs in mitosis, resulting in lagging ACs. The DNA replication efficiency of ACs  
20 improves over several cell cycles. We found that a condensin subunit, SMC-4, but not the replicative  
21 helicase component, MCM-2, facilitates *de novo* CENP-A<sup>HCP-3</sup> deposition on nascent ACs.  
22 Furthermore, H3K9ac, H4K5ac, and H4K12ac are highly enriched on newly chromatinized ACs. HAT-  
23 1 and RbAp46/48<sup>LIN-53</sup>, which are essential for *de novo* centromere formation and segregation  
24 competency of nascent ACs, also hyperacetylate histone H3 and H4. Different from centromere  
25 maintenance on endogenous chromosomes, where Mis18BP1<sup>KNL-2</sup> functions upstream of  
26 RbAp46/48<sup>LIN-53</sup>, RbAp46/48<sup>LIN-53</sup> depletion causes the loss of both CENP-A<sup>HCP-3</sup> and Mis18BP1<sup>KNL-2</sup>  
27 initial deposition at *de novo* centromeres on ACs.

28 **INTRODUCTION**

29 Histone H3 variant, CENP-A, replaces histone H3 in the centromeric nucleosomes and serves as the  
30 foundation for building the kinetochore, which connects the sister chromatids to opposite spindles and  
31 orchestrates chromosome movement. Centromere propagation through cell cycles and generations is  
32 crucial for ensuring accurate chromosome segregation and maintenance of genome integrity, which

33 relies on histone chaperones to deposit CENP-A precisely to the centromeric regions of sister  
34 chromatids.

35 Ectopic formation of a centromere can cause dicentric chromosome formation, which undergoes  
36 chromosome breakage-fusion cycle, leading to chromosomal rearrangements, chromosome loss or  
37 gain, aneuploidy, and potentially chromosome instability and tumorigenesis. Many cases of  
38 neocentromeres were found in human patients with congenital abnormalities or developmental  
39 disorders (1). The mechanism of new centromere formation is still not fully understood because of the  
40 technical challenges in tracing the early events of neocentromere formation in patients' cells.  
41 However, this phenomenon has been observed in diverse species. For example, tethering CENP-A-  
42 specific chaperones to a euchromatin locus or overexpressing CENP-A could cause ectopic CENP-A  
43 localization and ectopic centromere formation (2,3). Besides, transforming or transfecting centromeric  
44 DNA into yeast or human cells can form artificial chromosomes with *de novo* centromeres (2,3).  
45 However, artificial chromosome formation in these species often relies on the presence of their own  
46 centromeric DNA sequences, requiring long-term drug selection, and has relatively low frequencies of  
47 *de novo* centromere formation, which has limited their applications in studying the early events of new  
48 centromere formation.

49 In *C. elegans*, injecting foreign DNA, even devoid of *C. elegans* sequences, into its gonad could form  
50 episomal extra-chromosomal arrays, also known as artificial chromosomes (ACs), in the embryonic  
51 cells. These ACs can be propagated mitotically and inherited through subsequent generations (4,5).  
52 These heritable ACs have established a functional holocentromere, rather than hitchhiking on the  
53 endogenous chromosomes (6). Dissecting the mechanism of *de novo* centromere establishment on  
54 ACs could help to understand the process of neocentromere formation on endogenous  
55 chromosomes.

56 In the present study, after injection of short, linear DNA, we investigated the timing of *de novo* CENP-  
57 A<sup>HCP-3</sup> deposition on ACs, and demonstrated that CENP-A<sup>HCP-3</sup> starts to assemble on ACs after  
58 fertilization. Another inner kinetochore protein, Mis18BP1<sup>KNL-2</sup> and an inner centromere protein, AIR-2,  
59 are also recruited to the nascent ACs in the first mitosis. The ACs attempt to segregate in the first cell  
60 division, but with anaphase bridges. We also analyzed the histone post-translational modifications  
61 (PTMs) that co-occur with *de novo* CENP-A<sup>HCP-3</sup> deposition on nascent ACs in one-cell embryos.  
62 Based on the profiles of the enriched histone PTMs on nascent ACs, we depleted the relevant histone  
63 modifiers or the associated histone chaperones by RNA interference (RNAi), and analyzed the AC  
64 segregation rate by live-cell imaging and the centromeric protein signals by immunofluorescence  
65 analysis. We demonstrated that HAT-1 and RbAp46/48<sup>LIN-53</sup> are required for the enriched H3K9ac,  
66 H4K5ac and H4K12ac on nascent ACs in one-cell embryos. Depleting HAT-1, RbAp46/48<sup>LIN-53</sup> or both  
67 will reduce or abolish ACs' segregation competency by reducing *de novo* CENP-A<sup>HCP-3</sup> deposition on  
68 nascent ACs. Surprisingly, at the *de novo* centromere on ACs, RbAp46/48<sup>LIN-53</sup> depletion leads to the  
69 loss of both CENP-A<sup>HCP-3</sup> and Mis18BP1<sup>KNL-2</sup> initial deposition, which suggests that while  
70 Mis18BP1<sup>KNL-2</sup> could be the self-directing factor for centromere maintenance in existing centromeres,  
71 it is downstream of RbAp46/48<sup>LIN-53</sup> in initial centromere establishment. We show that efficient *de*

72 *novo* CENP-A<sup>HCP-3</sup> deposition on ACs also requires condensin subunit SMC-4, but it is independent of  
73 DNA replicative helicase component, MCM-2. These results demonstrate that the mechanism of *de*  
74 *novo* CENP-A<sup>HCP-3</sup> deposition on ACs requires histone acetyltransferase HAT-1, CENP-A deposition  
75 machinery, including histone chaperone RbAp46/48<sup>LIN-53</sup>, together with M18BP1<sup>KNL-2</sup> and SMC-4.

## 76 MATERIAL AND METHODS

### 77 Worm strains and maintenance

78 The CRISPR/Cas9 transgenic technique described by Dickinson and Goldstein (7) was used to  
79 design and generate a GFP-tagged HAT-1 at the endogenous locus. PCR genotyping was done using  
80 primer set: Seq-Hat-1 (Table S1). Worm strains used in this study are listed in Table S2. All worms  
81 were maintained at 22°C on standard EZ plates seeded with *E. coli* OP50.

### 82 Double-stranded RNA (dsRNA) synthesis and RNA interference (RNAi)

83 PCR primers were designed to amplify a region of target genes from N2 *C. elegans* genomic DNA or  
84 cDNA. T3 promoter (AATTAACCCTCACTAAAGG) or T7 promoter (TAATACGACTCACTATAGG)  
85 was added to the 5' end of primers. Primers (Table S1) were selected using NCBI-Primer-Blast and  
86 were subjected to BLAST search using the *C. elegans* genome to confirm the primer specificity. PCR  
87 was performed using TaKaRa Ex Taq® DNA Polymerase and the PCR products were purified by  
88 Qiagen PCR purification kit. Purified PCR products were subjected to *in vitro* transcription using  
89 Ambion T3 and T7 MEGAscript® Kit at 37°C for 4-6 hours. Reaction products were digested with  
90 TURBO DNase at 37 °C for 15 min and purified using Ambion MEGAclear™ Kit. Eluates were  
91 incubated at 68°C for 10 minutes followed by 37°C for 30 minutes for complementary RNA annealing.  
92 Annealed dsRNA was adjusted to 1 µg/µL in ddH<sub>2</sub>O for microinjection. For RNAi, L4 hermaphrodites  
93 were injected with dsRNA (1 µg/µL) and recovered at 22°C for 24 hours before further analysis. For  
94 RNAi plus AC introduction, L4 hermaphrodites were injected with dsRNA (1 µg/µL) and recovered at  
95 22°C for 18 hours to reach the young adult stage. The RNAi-treated worms were then injected with  
96 p64xLacO plasmid DNA, linearized by AfaI (L64xLacO) and purified, into the gonad and recovered at  
97 22°C for another 5 hours before live imaging or Immunofluorescence staining.

### 98 Live cell imaging and AC segregation assay

99 Episomal artificial chromosomes (ACs) were visualized by injecting DNA containing LacO tandem  
100 repeats as reported previously (6), except that we used linear DNA (L64xLacO) for microinjection.  
101 Injected worms were recovered on OP50-seeded plates for 5-8 hours after microinjection. 3-4 worms  
102 were then dissected in 2 µl M9 buffer to release embryos. Embryos were mounted on a freshly  
103 prepared 2% agarose pad and the slide edges were sealed with Vaseline. Live-cell images were  
104 taken with a Carl Zeiss LSM710 laser scanning confocal microscope with a 16 AC Plan-Neofluar 40x  
105 Oil objective lens and PMT detectors. Stacks with 17x1.32 µm planes were scanned for each embryo  
106 in a 3x zoom and a 1-minute or 30 second time interval, with 3.15 µs pixel dwell and 92 µm pinhole.  
107 Laser power for 488 nm and 543 nm was set at 5.5% and 6.5%, respectively.

108 To determine the AC segregation rates, every dividing cell that contains at least one AC was counted  
109 as one sample. Each division was categorized as either containing at least a segregating AC or  
110 containing all non-segregating AC(s). Segregating ACs were defined as those that aligned with the  
111 metaphase plate and segregated with endogenous chromosomes during anaphase. Non-segregating  
112 ACs were defined as those that remained in the cytoplasm or nucleus and did not segregate in  
113 mitosis. The AC segregation rate was calculated as the number of dividing cells containing  
114 segregating ACs over the total number of dividing cells containing ACs. Among the segregating ACs,  
115 those with anaphase bridges were referred to as ACs that attempted to segregate, but ACs were  
116 lagging during anaphase, and the AC segregation process is incomplete.

### 117 **Immunofluorescence (IF) staining**

118 Embryos were freeze-cracked after dissection of adult worms and fixed in -20°C methanol for 30  
119 minutes. Embryos were then rehydrated in PBS [137 mM NaCl, 2.7 mM KCl, 4.3 mM Na<sub>2</sub>HPO<sub>4</sub>, 1.4  
120 mM KH<sub>2</sub>PO<sub>4</sub>] for 5 minutes and blocked by AbDil [4% BSA, 0.1% Triton-X 100 in PBS] at room  
121 temperature for 20 minutes. Primary antibody incubation, using rabbit (Rb)-anti-HCP-3 (1:1000;  
122 Novus biologicals 29540002), Rb-anti-KNL-2 (1:500, a gift from Desai Lab), Rb-anti-SMC-4 (1:500, a  
123 gift from Desai Lab), Mouse (Ms)-anti-Lacl (1:250, Millipore 05-503), Rb-anti-H3K9ac (1:500; Millipore  
124 ABE18), Rb-anti-H4K5ac (1:500, Abcam ab51997), Rb-anti-H4K8ac (1:500, Abcam ab45166), Rb-  
125 anti-H4K12ac (1:500, Abcam ab177793), Rb-anti-H4K16ac (1:500, Abcam ab109463), Rb-anti-  
126 H3K27me3 (1:500; Millipore 07-449), Rb-anti-H3K4me (1:500, Abcam ab176877), Rb-anti-H3K4me2  
127 (Novus Biologicals NB21-1022), Rb-anti-H3K4me3(1:500, Abcam ab8580), Ms-anti-H3K9me2 (1:500  
128 Abcam, ab1220), Rb-anti-H3K9me3 (1:500, Abcam Ab8898), Rb-anti-H3 (1:1000, Abcam Ab18521)  
129 or Rb-anti-H4 (1:1000, Ab10158) was performed at 4°C overnight. Slides were washed with PBST  
130 3x10 minutes. The slides were then incubated with goat-anti-Ms-IgG FITC (1:100,000; Jackson  
131 ImmunoResearch Laboratories, 115-096-062) and goat-anti-Rb-IgG Alexa 647-conjugated secondary  
132 antibody (1:100,000; Jackson ImmunoResearch Laboratories, 111-606-045) at room temperature for  
133 1 hour, followed by DAPI (1µg/mL) staining for 15 minutes. The fluorescent signal of mChery::H2B is  
134 detectable after methanol fixation and was measured without antibody incubation. Mounting was done  
135 using ProLong gold antifade reagent (Life Technologies). Images were acquired from Zeiss LSM 780  
136 upright confocal microscope with a Plan-Apochromat 40x1.4 Oil DIC M27 objective and PMT  
137 detectors. Embryos were captured as z stacks with a z-step size at 0.4 µm and 3.15 µs of pixel dwell  
138 time. Stacks with 30-35 x 0.4 µm planes were scanned for each embryo in a 4x zoom. DAPI, FITC  
139 and Alex647 channels were scanned with 32 µm pinhole, and the images were saved in 16 bits  
140 format.

### 141 **5-Ethynyl-2'-deoxyuridine (EdU) staining of one-cell stage embryos**

142 L4 worms were grown on *perm-1* dsRNA-expressing bacteria diluted 1/6 with OP50 for 24 hours (8).  
143 EdU staining of embryos for 15 minutes was performed as described previously (9).

### 144 **Image quantification**

145 Images were processed with Fiji 2.0.0. For immunofluorescence, 31 z-sections were acquired with a  
146 spacing of 0.4  $\mu\text{m}$  for each embryo. The region of interest (ROI) and the number of z-stacks for each  
147 target object were manually selected. A larger area enclosing the whole ROI within the embryo was  
148 drawn in each sample (ROI-L). Integrated density (IntDen) equals to area times mean grey value. For  
149 each channel, the integrated density of the ROI and ROI-L from all selected z-stacks containing the  
150 target object were summed ( $\text{ROI}^{\text{IntDen}}$  and  $\text{ROI-L}^{\text{IntDen}}$ ). The area between ROI and ROI-L were used  
151 for calculating the mean grey value of background following the equation  $\text{Bg}^{\text{mean}} = (\text{ROI-L}^{\text{IntDen}} -$   
152  $\text{ROI}^{\text{IntDen}}) / (\text{ROI-L}^{\text{area}} - \text{ROI}^{\text{area}})$ . The corrected integrated density of each targeted protein, histone  
153 modification or EdU in ROI =  $\text{ROI}^{\text{IntDen}} - (\text{ROI}^{\text{area}} \times \text{Bg}^{\text{mean}})$  was then normalized with the corrected  
154 integrated density of DAPI.

## 155 RESULTS

### 156 Formation of artificial chromosomes (ACs) through chromatinization and *de novo* 157 centromerization of foreign DNA in *C. elegans* one-cell embryos

158 To follow the fate of foreign DNA injected into the syncytial germline of *C. elegans*, the germline,  
159 oocytes and embryos were imaged 5 hours after injection of linearized 64 copy-LacO arrays  
160 (L64xLacO). To identify the timing of DNA array formation, DAPI (4',6-diamidino-2-phenylindole)  
161 staining was used to indicate the location, size and morphology of the concatemered injected  
162 foreign DNA in the germline. To determine the timing of nucleosome assembly and *de novo*  
163 centromere formation, live-cell imaging of histone H2B (H2B::mCherry) and CENP-A<sup>HCP-3</sup>::GFP was  
164 used to indicate the status of canonical histone deposition and centromeric nucleosome assembly,  
165 respectively. DAPI staining of the HMW foreign DNA could not be observed in the syncytial gonad  
166 where L64xLacO was injected. However, punctate DAPI foci were found in the cytoplasm of the  
167 diplotene and diakinesis oocytes, suggesting that the injected DNA fused into high molecular weight  
168 (HMW), extra-chromosomal DNA arrays (Figure 1A and Figure S1 A). Based on the morphology and  
169 size, the HMW DNA arrays can be easily distinguished from the 6 highly compacted endogenous  
170 bivalent chromosomes. These DNA arrays in oocytes lack histone H2B, CENP-A<sup>HCP-3</sup> and  
171 Mis18BP1<sup>KNL-2</sup> in oocytes (Figure 1A and Figure S1A). However, in fertilized zygotes, these DNA  
172 arrays became artificial chromosomes (ACs) that contain detectable histone H2B (6) and CENP-A<sup>HCP-</sup>  
173 <sup>3</sup> (Figure 1B), indicating that chromatinization and *de novo* centromerization of foreign DNA have  
174 begun in one-cell embryos after fertilization. CENP-A<sup>HCP-3</sup> signal was observed on ACs as early as in  
175 embryos undergoing meiosis I (Figure 1B). Live-cell imaging showed that newly formed ACs aligned  
176 at the metaphase plate and attempted to segregate during the first mitosis (Figure 1C, S1B and  
177 Suppl.Video1). All of the aligned ACs were pulled towards opposite poles at anaphase, but all form  
178 chromosome bridges (Figure 1C and S2G). This result suggests that the kinetochore on ACs were  
179 sufficient to attach to the mitotic spindles. To elucidate the cause of chromosome bridge formation, we  
180 investigate the level and orientation of kinetochore proteins on these newly formed ACs.

### 181 Impaired DNA replication does not affect *de novo* CENP-A deposition, but causes centromere 182 disorganization on metaphase ACs

183 MCM-2, a component of the MCM2-7 replicative helicase, is essential for DNA replication (10), and it  
184 is also a histone chaperone for restoring histones to newly synthesized DNA (11). Because the  
185 formation of the MCM-2-7 complex depends on each of its subunits, depleting MCM-2 will prevent  
186 MCM-2-7 complex assembly and block the process of DNA replication (10). To determine the effect of  
187 MCM-2 on initial CENP-A<sup>HCP-3</sup> deposition and *de novo* centromere formation, we performed double-  
188 stranded RNA (dsRNA) microinjection to deplete *mcm-2* mRNA. None of the embryos from the  
189 injected worms were able to hatch (data not shown), suggesting that the RNAi of *mcm-2* is highly  
190 efficient. However, our result shows that MCM-2 depletion does not prevent ACs from aligning at the  
191 metaphase plate and attempting to segregate with the endogenous chromosomes (Figure S2H and  
192 S2I). Immunofluorescence analysis shows that the essential inner kinetochore proteins, CENP-A<sup>HCP-3</sup>  
193 and Mis18BP1<sup>KNL-2</sup>, were both present on the nascent ACs that lined up at metaphase plate and on  
194 the bridging ACs at anaphase in one-cell embryos (Figure 2A and 2B). Quantification of the integrated  
195 intensity of CENP-A<sup>HCP-3</sup> on nascent ACs, normalized to the total amount of DNA on ACs, shows no  
196 significant reduction of CENP-A<sup>HCP-3</sup> incorporation in *mcm-2* RNAi-treated embryos, which suggests  
197 that *de novo* CENP-A<sup>HCP-3</sup> deposition is independent of MCM-2 (Figure 2E and 2F). Moreover, the  
198 recruitment of outer kinetochore and spindle checkpoint component, BUB-1, on ACs is also not  
199 abolished upon MCM-2 depletion (Figure S2J).

200 Proper sister chromatid segregation depends on the bi-orientation of sister kinetochores on sister  
201 chromatids, and the capture of microtubules emanating from opposite centrosomes. However, the  
202 initially formed kinetochore on nascent ACs lacks bi-orientation at metaphase (Figure 2A), but is all  
203 over the AC, potentially causing merotelic attachments of microtubules to the nascent ACs, which  
204 leads to the lagging of ACs during chromosome segregation in anaphase. Because inner centromeric  
205 proteins, such as AIR-2 and condensin II, also contribute to forming bi-oriented kinetochores (12), we  
206 checked if inner centromere proteins are present on nascent ACs that aligned at the metaphase plate.  
207 Our immunofluorescence analysis shows that inner centromeric protein, AIR-2, and condensin II  
208 component, SMC-4, are both recruited to the nascent ACs at the metaphase plate (Figure S2A and  
209 S2B). In the properly segregated endogenous chromatids, SMC-4 dissociates from the chromatin  
210 during anaphase. In contrast, SMC-4 is still found in the center of the AC chromatin bridges in late  
211 anaphase (Figure S2B). DNA replication has been shown to be needed for chromatin decondensation  
212 in *C. elegans* embryos in anaphase (9), which is consistent with the loss of condensin II component  
213 SMC-4 during anaphase. We found that impairing DNA replication by hydroxyurea (HU) treatment  
214 also results in the persistent presence of SMC-4 on the bridging endogenous chromosomes in late  
215 anaphase (Figure S2C). We proposed that incomplete DNA replication is the reason why nascent  
216 ACs are lagging in anaphase.

217 We then measured the DNA replication efficiency on ACs by their 5-ethynyl-2'-deoxyuridine (EdU)  
218 incorporation efficiency in one-cell stage and multi-cell stage embryos. In one-cell embryos, ACs  
219 showed at least 68% reduction of EdU incorporation when compared to endogenous chromosomes  
220 (Figure 2C and D), which suggests that DNA replication is less efficient on ACs in early-stage  
221 embryos. Also, live-cell imaging shows that MCM-4::mCherry (another component of MCM-2-7 DNA

222 replicative helicase complex), which is supposed to dissociate from endogenous chromosomes before  
223 metaphase, still has prolonged association with the ACs (Figure S2D), indicating that DNA replication  
224 on ACs has yet to be completed even at metaphase. Thus, we proposed that incomplete DNA  
225 replication on ACs (Figure 2C) may contribute to the lack of AC's kinetochore bi-orientation and the  
226 lagging ACs in early-stage embryos. In multi-cell embryos, however, we found that the replication of  
227 ACs has improved, where the EdU incorporation rate on ACs is comparable to that on endogenous  
228 chromosomes (Figure 2C and 2D). Consistently, we found more ACs in multi-cell embryos (37%)  
229 possess bi-orientated centromeres than in one-cell embryos (0%) in wild-type (Figure 2E and 2G). As  
230 expected, more ACs segregated evenly in multi-cell stage embryos than in one-cell stage embryos  
231 (Figure S2F and S2G).

### 232 **Condensin II facilitates *de novo* CENP-A<sup>HCP-3</sup> deposition on nascent ACs in one-cell embryos**

233 In *C. elegans*, condensin II complex co-localizes with centromere proteins on metaphase  
234 chromosomes (13,14), and is proposed to have a specific function at the centromere in addition to  
235 chromatin condensation. In human cells and *Xenopus* egg extracts, condensin II is required for new  
236 CENP-A deposition in mitotic cells and new CENP-A loading in 1<sup>st</sup> mitosis, respectively (15,16). As  
237 the SMC-4 signal is positive on nascent ACs, we further determined if condensin II contributes to *de*  
238 *novovo* centromere formation on ACs in *C. elegans* embryos. Quantification of the CENP-A<sup>HCP-3</sup> level on  
239 ACs shows a significant reduction of CENP-A<sup>HCP-3</sup> level in *smc-4* RNAi-treated embryos, suggesting  
240 that condensin II facilitates *de novo* CENP-A<sup>HCP-3</sup> deposition on nascent ACs in *C. elegans* embryos  
241 (Figure 3).

### 242 **The spectrum of histone post-translational modifications (PTMs) on nascent ACs**

243 To further identify essential factors in *de novo* centromere formation, we profiled the histone PTMs on  
244 the nascent ACs. We hypothesize that histone-modifying codes that co-exist with chromatinization  
245 and centromerization on newly formed ACs in one-cell embryos may help us identify the required  
246 factors. We chose several histone PTMs that have been reported to be associated with centromere  
247 function. The spectrum of histone PTMs on newly formed ACs in one-cell embryos by  
248 immunofluorescence analysis (Figure 4 and S3) is summarized in Table 1. For PTMs that are  
249 associated with transcription activity, we analyzed H3K4me1, H3K4me2 and H3K4me3 on newly  
250 formed ACs (Figure 4A). Methylation of H3K4 is associated with active transcription. The presence of  
251 a medium level of H3K4me1 on ACs, even with the lack of H3K4me2 and H3K4me3, suggests that  
252 ACs might be actively transcribing. It has been shown that RNAPII docking facilitates *de novo*  
253 centromere formation in ACs formed by injecting circularized, supercoiled p64xLacO plasmid (17).  
254 Consistently, the signal intensities of H4K5ac (Figure 4B), H4K12ac (Figure 4C), H3K9ac (Figure 4D)  
255 and H4K20me (Figure 4E) on nascent ACs are significantly higher than that on endogenous  
256 chromosomes, with 3-, 3.5-, 2.2- and 10-fold enrichment, respectively. Meanwhile, the DNA  
257 replication-associated histone PTM, H3K56ac, on nascent ACs has dimmer signal intensity as  
258 compared to that on endogenous chromosomes (Figure 4A and S3). This is consistent with the above  
259 finding that replication is less efficient on nascent ACs than on endogenous chromosomes (Figure 2C

260 and 2D). Moreover, heterochromatin-associated histone PTMs, including H3K9me2, H3K9me3 and  
261 H3K27me3, are undetectable on nascent ACs in one-cell embryos (Figure 4A and S3), consistent  
262 with our previous finding that heterochromatin is dispensable for *de novo* centromere formation (6).

### 263 **The AC segregation and the enrichment of H4K5ac, H4K12ac and H3K9ac on ACs depend on** 264 **RbAp46/48<sup>LIN-53</sup> and HAT-1**

265 To investigate whether the corresponding histone modifying enzymes of the enriched AC PTMs  
266 facilitate *de novo* centromere formation, we performed RNA interference by injecting dsRNA of  
267 candidate histone modifier genes to L4 stage worms expressing GFP::LacI and mCherry::H2B (Figure  
268 5A). The RNAi depletion efficiency of each gene was confirmed by live imaging (Figure S4A) or RT-  
269 qPCR (Figure S4B). Eighteen hours after dsRNA injection, L64xLacO was injected to RNAi-treated  
270 worms or untreated worms of the same stage. Embryos were dissected from injected worms,  
271 mounted for live-cell imaging to measure the AC segregation rate, and for immunofluorescence  
272 analysis to compare the CENP-A<sup>HCP-3</sup> signal on ACs. Snapshots (Figure 5B) and videos (Suppl.  
273 Video3 and 4) from live-cell imaging show an example of a WT (untreated) and a *lin-53* RNAi-treated  
274 embryo that contains ACs in the first 3 consecutive cell divisions, from one-cell stage to four-cell  
275 stage. A nascent AC in a WT embryo aligned at the metaphase plate with endogenous chromosomes,  
276 attempted to segregate, but formed chromosome bridges at the first anaphase in one-to-two cell  
277 stage, and has less severe chromosome lagging during the three-to-four cell transition. For untreated  
278 controls, the percentage of one-cell embryos that have segregating ACs among all one-cell embryos  
279 with ACs is 60%, including segregating ACs with anaphase bridges. In contrast, all the nascent ACs  
280 loss their segregation competency in *lin-53* RNAi-treated embryo, and just passively remain in one of  
281 the two daughter cells during each division.

282 We also depleted individual histone acetyltransferases (*hat-1*, *cbp-1*, *mys-1*, *mys-2*, *lsy-12* and *mys-*  
283 *4*), a histone deacetylase (*hda-1*), a histone methyltransferase (*set-1*) that is responsible for  
284 H4K20me (18), or depleted them in double and triple combinations. Among all single RNAi treatments  
285 of acetyltransferases, *hat-1* RNAi significantly reduces AC segregation frequency to 17% ( $p < 0.05$ ).  
286 Single RNAi of other acetyltransferases (*cbp-1*, *mys-1*, *mys-2*) does not cause any significant  
287 decrease in the AC segregation rate. Double knockdown of *hat-1 mys-1* and *hat-1 mys-2* and triple  
288 knockdown of *hat-1 mys-1 mys-2* further decrease AC segregation rates in one-cell stage embryos.  
289 These findings indicate that acetyltransferases play an essential role in the segregation of nascent  
290 ACs. MYS-1 and MYS-2 may share some overlapping acetylation targets with HAT-1, and thus have  
291 additive effects upon depletion. In contrast, the AC segregation rates in *mys-1 mys-2* knockdown and  
292 *lsy-12 mys-4* knockdown embryos, at 30% and 67%, respectively, have no significant difference with  
293 WT embryos (Figure 5C). Depletion of *hda-1* or *set-1* also did not affect AC segregation in one-cell  
294 embryos (Figure 5C).

295 Although RbAp46/48 and HAT-1 were conserved, and found in the same complex in many species  
296 (19-21), the physical interaction between RbAp46/48<sup>LIN-53</sup> and HAT-1 has not been reported in *C.*  
297 *elegans* (22). We created a transgenic strain expressing GFP::HAT-1 by CRISPR-Cas9 at the



298 endogenous locus (7). The expression of GFP::HAT-1 was observed in embryonic nuclei (Figure  
299 S4A). We also confirmed the physical interaction between RbAp46/48<sup>LIN-53</sup> and HAT-1 by reciprocal  
300 co-immunoprecipitation (co-IP) using embryo extracts (Figure S5).

301 As RbAp46/48 is known to be a H3-H4 chaperone (23-25), we found that RbAp46/48<sup>LIN-53</sup> is also  
302 essential for histone H3 deposition on nascent ACs, but surprisingly not histone H4 (Figure S4C and  
303 S4D). The levels of H4K5ac, H4K12ac and H3K9ac on nascent ACs are significantly decreased to an  
304 undetectable level in both *lin-53* RNAi-treated and in *lin-53 hat-1* double RNAi-treated embryos  
305 (Figure 5D-F), indicating that RbAp46/48<sup>LIN-53</sup> and HAT-1 may function together for depositing  
306 acetylated histones.

### 307 **HAT-1 assists RbAp46/48<sup>LIN-53</sup> in *de novo* CENP-A<sup>HCP-3</sup> deposition on nascent ACs**

308 Since depletion of *hat-1*, *lin-53* and double depletion of *lin-53 hat-1* significantly decreased AC  
309 segregation rate, we proposed that RbAp46/48<sup>LIN-53</sup> and HAT-1 are responsible for depositing CENP-  
310 A<sup>HCP-3</sup>-H4 pre-nucleosomes on nascent ACs after fertilization. We performed immunofluorescence  
311 analysis of CENP-A<sup>HCP-3</sup> on the nascent ACs in *hat-1*, *lin-53* and *lin-53 hat-1* double RNAi-treated  
312 embryos. We found that the CENP-A<sup>HCP-3</sup> level on ACs is significantly decreased in *hat-1* and *lin-53*  
313 RNAi-treated embryos (Figure 6A-C) and is completely abolished in *lin-53 hat-1* double RNAi-treated  
314 embryos (Figure 6A and 6D). The more severe abolishment of CENP-A<sup>HCP-3</sup> in *lin-53 hat-1* double  
315 depletion suggests that HAT-1 and RbAp46/48<sup>LIN-53</sup> may also function separately for recruiting CENP-  
316 A<sup>HCP-3</sup>, in addition to acting together in a complex.

### 317 **RbAp46/48<sup>LIN-53</sup>-initiated *de novo* CENP-A<sup>HCP-3</sup> deposition is required for Mis18BP1<sup>KNL-2</sup> 318 localization on ACs**

319 Mis18BP1<sup>KNL-2</sup> and CENP-A<sup>HCP-3</sup> are interdependent for each other's localization in endogenous  
320 chromosomes of *C. elegans* (26). To test if Mis18BP1<sup>KNL-2</sup> is also necessary for *de novo* CENP-A<sup>HCP-3</sup>  
321 deposition on nascent ACs, we depleted Mis18BP1<sup>KNL-2</sup> and performed immunofluorescence analysis,  
322 which shows that *knl-2* RNAi almost completely abolished CENP-A<sup>HCP-3</sup> signal on nascent ACs  
323 (Figure 6A and 6E). This indicates that Mis18BP1<sup>KNL-2</sup> is also essential for CENP-A<sup>HCP-3</sup> localization  
324 on both nascent ACs and endogenous centromeres. Similar to endogenous centromeres,  
325 Mis18BP1<sup>KNL-2</sup> localization on nascent ACs also relies on CENP-A<sup>HCP-3</sup> (Figure 7A and 7C). We  
326 simultaneously stained CENP-A<sup>HCP-3</sup> and Mis18BP1<sup>KNL-2</sup> on nascent ACs in one-cell embryos, and  
327 show that 62% of ACs have both CENP-A<sup>HCP-3</sup> and Mis18BP1<sup>KNL-2</sup>, while 38% of ACs have neither of  
328 the signals. We have not found any ACs that have only CENP-A<sup>HCP-3</sup> or only Mis18BP1<sup>KNL-2</sup> (Figure  
329 S6A and B), which is consistent with the co-dependence of Mis18BP1<sup>KNL-2</sup> and CENP-A<sup>HCP-3</sup>  
330 localization (Figure 8A).

331 However, on endogenous chromosomes, *lin-53* RNAi only reduced CENP-A<sup>HCP-3</sup> level but did not  
332 affect Mis18BP1<sup>KNL-2</sup> level (27). We monitored the M18BP1<sup>KNL-2</sup> signal on nascent ACs in *lin-53* RNAi-  
333 treated embryos. Surprisingly, at *de novo* centromeres on nascent ACs, RbAp46/48<sup>LIN-53</sup> depletion  
334 also leads to the loss of initial Mis18BP1<sup>KNL-2</sup> deposition (Figure 7A and 7B), which suggests that

335 while Mis18BP1<sup>KNL-2</sup> could be a self-directing factor for centromere maintenance in the existing  
336 centromeres, it is downstream of RbAp46/48<sup>LIN-53</sup> in *de novo* centromere establishment (Figure 8A).

337 In human cells, MYST2 has been described as an interactor with Mis18 complex for regulating CENP-  
338 A deposition (28). However, the function of MYS family proteins on centromere chromatin has not  
339 been reported previously in *C. elegans*. Since we found that MYS-1 and MYS-2 can partially  
340 complement HAT-1 in facilitating AC segregation, we tested whether double knockdown of *mys-1* and  
341 *mys-2* prevents Mis18BP1<sup>KNL-2</sup> localization on nascent ACs. However, the Mis18BP1<sup>KNL-2</sup> signal on  
342 nascent ACs in *mys-1* and *mys-2* double depleted embryos shows no significant difference as  
343 compared with WT (untreated) embryos (Figure 7A and 7C).

## 344 DISCUSSION

345 In our previous study, we observed that foreign circular, supercoiled plasmid DNA injected into *C.*  
346 *elegans* gonad forms ACs in embryonic cells after 4-8 hours of microinjection (6). ACs gradually  
347 acquire segregation competency after they go through several cell divisions (6). Since then, we have  
348 tested AC formation by injecting different DNA forms, including linearized plasmid DNA and linearized  
349 plasmid DNA mixed with sheared salmon or enzyme-digested yeast genomic DNA (Lin and Yuen,  
350 submitted back-to-back). We found that it is more efficient to form larger ACs by concatemerization  
351 from linear DNA than from circular DNA, based on the foci size of GFP::LacI, which binds to the  
352 injected LacO arrays, in the embryos (Figures S1D and S1E). This may suggest that it is more  
353 efficient to fuse linear foreign DNA fragments by the non-homologous end joining (NHEJ) pathway  
354 than fusing circular DNA (4). We also found that ACs generated by injecting linear DNA (L64xLacO)  
355 acquires segregation ability significantly faster than those generated by injecting circular DNA (Figure  
356 S1F), possibly due to the larger ACs it produces. By injecting a complex DNA mixture from sheared  
357 salmon sperm DNA without the LacO repeat sequence, we confirmed that *de novo* CENP-A<sup>HCP-3</sup>  
358 deposition can also occur on “complex” AC without LacO sequences (Figure S1G and S1H).  
359 However, the AC segregation rates in repetitive ACs and complex ACs have no significant difference  
360 (Lin and Yuen, submitted back-to-back).

361 Chromatinized ACs were formed in fertilized embryos a few hours after microinjection of foreign  
362 circular DNA (6) and linear DNA. Histone H2B and centromeric protein CENP-A<sup>HCP-3</sup> signals on ACs  
363 were detectable in fertilized embryos (Figure 1 B-C). This is consistent with the finding that major  
364 sperm proteins trigger nuclear membrane breakdown (29) and release the nuclear-localized histones  
365 and centromeric proteins to the cytoplasm to allow chromatinization and centromerization on the  
366 HMW-DNA arrays, which are initially located in the cytoplasm. The whole process of AC formation  
367 has been summarized in Figure 8B.

368 Interestingly, in wild-type, the level of CENP-A<sup>HCP-3</sup> (normalized to the amount of DNA based on DAPI  
369 staining) on nascent ACs formed from linear plasmid DNA is comparable to that on endogenous  
370 chromosomes in one-cell embryos (Figure S2K). This observation is slightly different from the nascent  
371 ACs formed from circular DNA, in which the level of CENP-A<sup>HCP-3</sup> on ACs in one-cell stage is lower

372 than that on endogenous chromosomes, whilst CENP-A<sup>HCP-3</sup> signal on ACs increases quickly in the  
373 first few cell cycles to become comparable with that in endogenous chromosomes in 17-32 cell stage  
374 (17). This difference could be due to the difference in size or structure of the ACs (Figure S1D-F).

375 DNA replication is required for chromosome condensation during prophase (the first cell cycle) and  
376 chromosome decondensation during anaphase (the second cell cycle) in *C. elegans* embryos (9).  
377 HU-treated embryos have been described to cause excessive chromatin bridge formation (30), with  
378 persistent association with condensin II subunit SMC-4 (Figure S2A and S2B), which resembles the  
379 phenomenon of nascent AC segregation with bridges. We examined the DNA replication status on  
380 nascent ACs in one-cell stage and in later stage embryos. The efficiency of incorporating EdU on the  
381 newly formed ACs is only about 32% of that of the endogenous chromosomes in one-cell embryos  
382 (Figure 2C and D), suggesting that DNA replication is less efficient on ACs. We demonstrated that  
383 MCM-4::mCherry is still associated with ACs at the first metaphase, which further indicates that the  
384 replication of AC had not completed when the cells entered first mitosis (Figure S2C and S2D). We  
385 have ruled out the possibility that Lacl::GFP-tethering on ACs restrains replication initiation or  
386 replication fork movement, as the lagging AC is still observed in cells without Lacl::GFP expression  
387 (Figure S2E). In *C. elegans*, DNA replication origins contain H3K4me2 enrichment (31), whereas  
388 H3K4me2 is absent on nascent ACs. The underlying sequences and chromatin environment of ACs  
389 could be the reason for the less efficient DNA replication on nascent ACs.

390 During DNA replication, nucleosomes are disassembled from the parental DNA strand ahead of the  
391 DNA replication machinery (32). MCM-2 has been recently proposed to be able to chaperone H3-H4  
392 and CENP-A-H4 dimers, for replenishing them to the sister chromatins behind the replication forks  
393 (11). However, *mcm-2* RNAi did not reduce the level of *de novo* CENP-A<sup>HCP-3</sup>, normalized to DNA  
394 (DAPI), on nascent ACs (Figure 2E and 2F), and their ability to recruit outer kinetochore and spindle  
395 checkpoint component BUB-1 (Figure S2J). Thus, we postulate that *de novo* centromere formation  
396 *per se* is independent of DNA replication. This is similar to the case in human cells, where CENP-A is  
397 duplicated on chromatin before and independent of DNA replication (33). Although it is not clear when  
398 new CENP-A<sup>HCP-3</sup> is loaded on the holocentromere during the cell cycle in *C. elegans*, we speculate  
399 that the CENP-A<sup>HCP-3</sup> level in *C. elegans* correlates with the amount of DNA, as observed in previous  
400 study (34), and from the comparison in wild-type and *mcm-2* RNAi-treated embryos (Figure 2E and  
401 2F). On the other hand, CENP-A<sup>cs64</sup> in budding yeast is turned over and reloaded to sister chromatids  
402 in S phase, dependent on DNA replication (35,36).

403 Condensin II, but not condensin I, is specifically enriched at the centromeres and has been found to  
404 promote CENP-A deposition in human cells and *Xenopus* oocyte extracts (15,16,37). In human cells,  
405 the interaction between condensin II and HJURP is needed for HJURP's centromeric localization, and  
406 for depositing new CENP-A (15). In contrast, depleting condensin II in *Xenopus* oocyte extracts  
407 reduces the CENP-A level at centromere, but not the HJURP level. In *C. elegans*, condensin II  
408 subunits also co-localize with CENP-A<sup>HCP-3</sup> starting at prometaphase in embryonic cells (13). We  
409 found that depleting condensin II component SMC-4 reduces *de novo* CENP-A<sup>HCP-3</sup> deposition on  
410 newly formed ACs, indicating that condensin II subunit SMC-4 facilitates *de novo* centromere

411 formation. However, we could not detect physical interaction between condensin II subunit SMC-4  
412 and CENP-A<sup>HCP-3</sup> chaperone RbAp46/48<sup>LIN-53</sup> (Figure S5A).

413 We screened for candidate histone PTMs on newly formed ACs that coincide with *de novo*  
414 centromere formation to elucidate the cellular pathways involved, because histone PTMs can signal  
415 downstream histone deposition, gene expression and chromatin condensation. H4K20me is one of  
416 the enriched PTM on nascent ACs. In human and chicken DT-40 cells, H4K20me was reported as a  
417 histone PTM on CENP-A nucleosomes enriched at centromeres, which is essential for CENP-T  
418 localization (38). In *C. elegans*, H4K20 is monomethylated by methyltransferase SET-1(18). However,  
419 the AC segregation rate in *set-1* RNAi-treated embryos shows no significant difference from that in  
420 untreated embryos (Figure 5C), indicating that H4K20me could be a potential CENP-A<sup>HCP-3</sup> post-  
421 deposited marker, which may not be essential for *de novo* CENP-A<sup>HCP-3</sup> deposition.

422 We found that histone acetylation on H3K9, H4K5 and H4K12 was significantly enriched on nascent  
423 ACs formed from linear DNA, which is consistent with the previously found acetylated H3K9 and H4  
424 (on K5, 8, 12, or 16) on ACs from circular injected DNA (17). H3K9ac has been reported to be  
425 associated with the deposition of newly synthesized histones H3 in *Tetrahymena*, while the involved  
426 acetyltransferase is not clear (39). In human cells, H3K9ac induces *de novo* CENP-A deposition on  
427 alphoid DNA at ectopic site and is compatible with centromere functioning (40). Notably, in species as  
428 divergent as humans, *Drosophila*, *Tetrahymena* and yeast, newly synthesized and newly deposited  
429 H4 are acetylated in a conserved pattern at lysines 5 and 12 before its association with DNA  
430 (20,39,41). Pre-nucleosomal H4 is di-acetylated at K5 and K12 by HAT-1 in human cells, *DT-40* cells  
431 and yeast, through forming a complex with H4 chaperone, RbAp46/48 (21,23,42). in fruit fly cells (43),  
432 and is essential for the viability and genome stability in mice (44). Double knockdown of *hat-1 mys-1*  
433 or *hat-1 mys-2* abolishes AC segregation during the first mitosis in *C. elegans*, while *mys-1 mys-2*  
434 double depletion causes an insignificant reduction of the AC segregation rate (Figure 5C).  
435 Consistently, MYS-1 MYS-2 double depletion does not reduce the level of M18BP1<sup>KNL-2</sup> on nascent  
436 ACs (Figure 7A and 7C). Both *mys-1* RNAi and *mys-2* RNAi enhance the *hat-1* RNAi effect on AC  
437 missegregation, suggesting that MYS-1 and MYS-2 might have overlapping targets with HAT-1.

438 *lin-53* depletion also significantly reduces histone H3 level on nascent ACs, but surprisingly, did not  
439 affect the level of histone H4 (Figure S4D). The timing suggests that CENP-A<sup>HCP-3</sup> deposition may  
440 occur at the same time as canonical nucleosome assembly, and RbAp46/48<sup>LIN-53</sup> is required for both  
441 CENP-A<sup>HCP-3</sup> and H3 assembly. We propose that RbAp46/48<sup>LIN-53</sup> may load acetylated nucleosomes  
442 to nascent chromatin, while non-acetylated histone H4, which could form a tetramer with histone  
443 H3.3, could be deposited to nascent ACs through other histone chaperones, like HIRA (45,46).  
444 Indeed, a previous study has shown that human Hat1-RbAp46 complex binds and acetylates H4 in  
445 H3.1-H4 complex more efficiently than that in H3.3-H4 complex (47). Hence, the depletion of *lin-53*  
446 leads to a significant decrease in H4K5ac and H4K12ac level (Figure 5D and 5E), but the total H4  
447 level remains unchanged (Figure S4D). A higher proportion of unacetylated H4 is on nascent ACs,  
448 which is consistent with the idea that RbAp46/48<sup>LIN-53</sup> preferentially deposits acetylated H4 on AC in  
449 *C. elegans*.

450 We observed a significant reduction of the AC segregation rate in *hat-1* RNAi-, *lin-53* RNAi- and *lin-53*  
451 *hat-1* double RNAi-treated embryos, indicating that RbAp46/48<sup>LIN-53</sup> and HAT-1 are both involved in  
452 *de novo* centromere formation (Figure 5C). In chicken DT-40 cells, RbAp48 is essential for new  
453 CENP-A deposition to the centromere, which cooperates with HAT-1 to acetylate pre-nucleosomal  
454 CENP-A-H4 complex at H4K5 and K12 (48). In *Drosophila*, an *in vitro* experiment shows that RbAp48  
455 alone is sufficient to assemble CENP-A<sup>CID</sup>-H4 to the naked DNA (49). New evidence shows that HAT-  
456 1 interacts directly with CENP-A<sup>CID</sup> in *Drosophila*. The depletion of HAT-1 reduces the efficiency of  
457 new CENP-A<sup>CID</sup> deposition significantly (43). Nevertheless, in fission yeast, RbAp46/48<sup>Mis16</sup> and  
458 HJURP<sup>SCM3</sup> are present in the same complex, where RbAp46/48<sup>Mis16</sup> distinguishes CENP-A-H4 from  
459 H3-H4 by recognizing HJURP<sup>SCM3</sup> and H4 independently (50). In HeLa cells, RNAi knockdown of  
460 RbAp46/48 reduces ectopic loading of CENP-A<sup>S68E</sup> mutant on the chromosome arms, which cannot  
461 bind to HJURP, suggesting that RbAp46/48 may deposit CENP-A<sup>S68E</sup>-H4 to ectopic loci in the  
462 absence of HJURP (51). However, in oocyte extracts of *Xenopus*, RbAp48 depletion does not affect  
463 CENP-A incorporation to the centromere on the sperm chromatin but causes ectopic CENP-A  
464 deposition (16,48). In *C. elegans* ACs, we found that both RbAp46/48<sup>LIN-53</sup> and HAT-1 are critical for  
465 *de novo* CENP-A<sup>HCP-3</sup> deposition. RbAp46/48<sup>LIN-53</sup> may deposit CENP-A<sup>HCP-3</sup> onto foreign DNA that  
466 has not been fully occupied by H3 or H3.3 nucleosomes (52). The enriched RNA polymerase II on the  
467 nascent ACs (17) might further create an open chromatin environment and generate nucleosome  
468 gaps that preferentially accumulate CENP-A<sup>HCP-3</sup> through RbAp46/48<sup>LIN-53</sup> loading (53).

469 M18BP1<sup>KNL-2</sup>, conserved in *C. elegans*, is upstream of RbAp46/48<sup>LIN-53</sup>, and both are essential for  
470 CENP-A<sup>HCP-3</sup> deposition in endogenous centromeres (26,27). In fission yeast, Mis-18, RbAp46/48<sup>Mis16</sup>  
471 and HJURP<sup>Scm3</sup> have been found in the same complex for depositing CENP-A<sup>Cnp1</sup> to the centromere  
472 (50,54,55). In humans and vertebrates, CENP-A-HJURP relies on the MIS18 complex (including MIS-  
473 18 $\alpha$ , MIS-18 $\beta$  and M18BP1) for centromeric targeting (56,57). Tethering LacI-fused M18BP1 or Mis-  
474 18 $\beta$  to the LacO region promotes new CENP-A deposition by recruiting HJURP to the tethered locus  
475 (56), similar to tethering HJURP to an ectopic locus (58). M18BP1<sup>KNL-2</sup>, as a priming factor, is  
476 anticipated to anchor to the existing centromeres for directing new CENP-A loading. Since *C. elegans*  
477 has no HJURP, Mis18 $\alpha$  nor Mis18 $\beta$ , M18BP1<sup>KNL-2</sup> alone is possibly sufficient to direct RbAp46/48<sup>LIN-53</sup>  
478 for depositing CENP-A<sup>HCP-3</sup> to existing centromeres. Here, we show that depleting M18BP1<sup>KNL-2</sup> also  
479 significantly reduced CENP-A<sup>HCP-3</sup> level on nascent ACs (Figure 5A and 5G), consistent with its effect  
480 on endogenous chromosomes. The inter-dependency between M18BP1<sup>KNL-2</sup> and CENP-A is also true  
481 for both endogenous chromosomes (26,27) and on nascent ACs. In RbAp46/48<sup>LIN-53</sup>-depleted  
482 embryos, M18BP1<sup>KNL-2</sup> was not able to localize to the nascent ACs without any pre-seeded CENP-  
483 A<sup>HCP-3</sup> (Figure 5A, 5G and Figure S6A and S6B). This finding strongly indicates that RbAp46/48<sup>LIN-53</sup>  
484 initiates CENP-A<sup>HCP-3</sup> nucleosome assembly on foreign DNA, which lays the foundation for loading of  
485 other kinetochore proteins. The centromeric localization dependency in *C. elegans* endogenous  
486 chromosomes and in *de novo* centromere formation on ACs has been summarized and compared  
487 (Figure 8A). It will be of great interest to know if RbAp46/48<sup>LIN-53</sup> and M18BP1<sup>KNL-2</sup> form a complex to  
488 deposit pre-nucleosomal CENP-A-H4, in which RbAp46/48<sup>LIN-53</sup> is released from the centromere after

489 the CENP-A<sup>HCP-3</sup> deposition, while M18BP1<sup>KNL-2</sup> is retained on the chromatin for CENP-A<sup>HCP-3</sup>  
490 stabilization and for recruiting outer kinetochore proteins.

491 Phosphorylation of CENP-A at Ser68 has been proposed to be important for preventing premature  
492 HJURP binding at metaphase in HeLa cells (51). The phospho-mimicking mutant, CENP-A<sup>S68Q</sup>,  
493 reduces its affinity to HJURP (51,59), but it is still able to support centromere function and long-term  
494 centromere maintenance in human RPE-1 cells (59). However, mutating the Ser68 residue to  
495 alanine, as a phospho-dead mutant, causes continuous CENP-A binding to HJURP and ectopic  
496 CENP-A deposition (51). Interestingly, this site is evolutionarily conserved in most eukaryotes except  
497 in *C. elegans* and budding yeast, where these CENP-A homologues have an alanine at this position.  
498 Hence, budding yeast HJURP<sup>Scm3</sup> constitutively binds to CENP-A<sup>Cse4</sup> at centromeres throughout the  
499 cell cycle in budding yeast (35). Therefore, in budding yeast and *C. elegans*, this serine to alanine  
500 mutation may allow HJURP and RbAp46/48 to be functionally redundant in persistent binding to the  
501 CENP-A/H4 dimer. In budding yeast, CENP-A<sup>cse4</sup> propagation relies on HJURP<sup>Scm3</sup>, and as a result,  
502 RbAp46/48<sup>HAT2p</sup> can be a non-essential protein in this species (60). Similarly, *C. elegans* can afford  
503 losing HJURP, as CENP-A<sup>HCP-3</sup> propagation depends on RbAp46/48<sup>LIN-53</sup> instead. RbAp46/48<sup>LIN-53</sup>  
504 does not rely on pre-existing CENP-A in order to deposit CENP-A<sup>HCP-3</sup> on foreign DNA. Furthermore,  
505 budding yeast and *C. elegans* have similar CENP-A propagation mechanisms, which are different  
506 from CENP-A propagation in human cells. For instance, pre-existing centromeric CENP-A<sup>Cse4</sup> is  
507 completely turned over in S phase in budding yeast. While the cell cycle stage of CENP-A<sup>HCP-3</sup>  
508 turnover is unknown in *C. elegans*, it is also almost completely turned over (34,35). In yeast and  
509 worms, they tend to maintain a consistent amount of CENP-A per chromatin or total DNA. Potentially,  
510 budding yeast and *C. elegans* have developed an alternative pathway of regulating CENP-A  
511 propagation, in which the cue for new CENP-A deposition is not only dependent on pre-existing  
512 CENP-A. This, combined with promiscuous CENP-A<sup>HCP-3</sup> deposition facilitated by RbAp46/48<sup>LIN-53</sup>,  
513 allows ACs to be formed easily in *C. elegans*, which provides a convenient model for the study of *de*  
514 *novo* centromere formation.

515

## 516 **ACKNOWLEDGEMENT**

517 We thank J Dumont, KM Chan, R Ng, Y Zhai, and W Den for critical reading of earlier versions of the  
518 manuscript, and the Yuen lab for discussion.

519

## 520 **FUNDING**

521 This work was supported by the Hong Kong Research Grants Council Collaborative Research Fund  
522 [C7058-18G to KWYY], General Research Grant [17126717 to KWYY] and Early Career Scheme  
523 [788012 to KWYY].

524

525 **CONFLICT OF INTEREST**

526 The authors declare no conflict of interest.

527

528 **REFERENCES**

- 529 1. Marshall, O.J., Chueh, A.C., Wong, L.H. and Choo, K.H. (2008) Neocentromeres: new insights  
530 into centromere structure, disease development, and karyotype evolution. *American journal of*  
531 *human genetics*, **82**, 261-282.
- 532 2. Catania, S., Pidoux, A.L. and Allshire, R.C. (2015) Sequence features and transcriptional stalling  
533 within centromere DNA promote establishment of CENP-A chromatin. *PLoS genetics*, **11**,  
534 e1004986.
- 535 3. Harrington, J.J., Van Bokkelen, G., Mays, R.W., Gustashaw, K. and Willard, H.F. (1997)  
536 Formation of de novo centromeres and construction of first-generation human artificial  
537 microchromosomes. *Nature genetics*, **15**, 345-355.
- 538 4. Stinchcomb, D.T., Shaw, J.E., Carr, S.H. and Hirsh, D. (1985) Extrachromosomal DNA  
539 transformation of *Caenorhabditis elegans*. *Molecular and cellular biology*, **5**, 3484-3496.
- 540 5. Mello, C.C., Kramer, J.M., Stinchcomb, D. and Ambros, V. (1991) Efficient gene transfer in  
541 *C.elegans*: extrachromosomal maintenance and integration of transforming sequences. *The*  
542 *EMBO journal*, **10**, 3959-3970.
- 543 6. Yuen, K.W., Nabeshima, K., Oegema, K. and Desai, A. (2011) Rapid de novo centromere  
544 formation occurs independently of heterochromatin protein 1 in *C. elegans* embryos. *Current*  
545 *biology : CB*, **21**, 1800-1807.
- 546 7. Dickinson, D.J., Pani, A.M., Heppert, J.K., Higgins, C.D. and Goldstein, B. (2015) Streamlined  
547 Genome Engineering with a Self-Excising Drug Selection Cassette. *Genetics*.
- 548 8. Carvalho, A., Olson, S.K., Gutierrez, E., Zhang, K., Noble, L.B., Zanin, E., Desai, A., Groisman, A.  
549 and Oegema, K. (2011) Acute drug treatment in the early *C. elegans* embryo. *PloS one*, **6**,  
550 e24656.
- 551 9. Sonnevile, R., Craig, G., Labib, K., Gartner, A. and Blow, J.J. (2015) Both Chromosome  
552 Decondensation and Condensation Are Dependent on DNA Replication in *C. elegans* Embryos.  
553 *Cell reports*, **12**, 405-417.
- 554 10. Sonnevile, R., Querenet, M., Craig, A., Gartner, A. and Blow, J.J. (2012) The dynamics of  
555 replication licensing in live *Caenorhabditis elegans* embryos. *The Journal of cell biology*, **196**, 233-  
556 246.
- 557 11. Huang, H., Stromme, C.B., Saredi, G., Hodl, M., Strandsby, A., Gonzalez-Aguilera, C., Chen, S.,  
558 Groth, A. and Patel, D.J. (2015) A unique binding mode enables MCM2 to chaperone histones  
559 H3-H4 at replication forks. *Nature structural & molecular biology*, **22**, 618-626.
- 560 12. Kaitna, S., Pasierbek, P., Jantsch, M., Loidl, J. and Glotzer, M. (2002) The aurora B kinase AIR-2  
561 regulates kinetochores during mitosis and is required for separation of homologous chromosomes  
562 during meiosis. *Current Biology*, **12**, 798-812.

- 563 13. Csankovszki, G., Collette, K., Spahl, K., Carey, J., Snyder, M., Petty, E., Patel, U., Tabuchi, T.,  
564 Liu, H., McLeod, I. *et al.* (2009) Three distinct condensin complexes control *C. elegans*  
565 chromosome dynamics. *Current biology : CB*, **19**, 9-19.
- 566 14. Hagstrom, K.A., Holmes, V.F., Cozzarelli, N.R. and Meyer, B.J. (2002) *C. elegans* condensin  
567 promotes mitotic chromosome architecture, centromere organization, and sister chromatid  
568 segregation during mitosis and meiosis. *Genes & development*, **16**, 729-742.
- 569 15. Barnhart-Dailey, M.C., Trivedi, P., Stukenberg, P.T. and Foltz, D.R. (2017) HJURP interaction with  
570 the condensin II complex during G1 promotes CENP-A deposition. *Molecular biology of the cell*,  
571 **28**, 54-64.
- 572 16. Bernad, R., Sanchez, P., Rivera, T., Rodriguez-Corsino, M., Boyarchuk, E., Vassias, I., Ray-  
573 Gallet, D., Arnautov, A., Dasso, M., Almouzni, G. *et al.* (2011) *Xenopus* HJURP and condensin II  
574 are required for CENP-A assembly. *The Journal of cell biology*, **192**, 569-582.
- 575 17. Zhu, J., Cheng, K.C.L. and Yuen, K.W.Y. (2018) Histone H3K9 and H4 Acetylations and  
576 Transcription Facilitate the Initial CENP-A(HCP-3) Deposition and De Novo Centromere  
577 Establishment in *Caenorhabditis elegans* Artificial Chromosomes. *Epigenetics & chromatin*, **11**,  
578 16.
- 579 18. Vielle, A., Lang, J., Dong, Y., Ercan, S., Kotwaliwale, C., Rechtsteiner, A., Appert, A., Chen, Q.B.,  
580 Dose, A., Egelhofer, T. *et al.* (2012) H4K20me1 contributes to downregulation of X-linked genes  
581 for *C. elegans* dosage compensation. *PLoS genetics*, **8**, e1002933.
- 582 19. Tong, K., Keller, T., Hoffman, C.S. and Annunziato, A.T. (2012) *Schizosaccharomyces pombe*  
583 Hat1 (Kat1) is associated with Mis16 and is required for telomeric silencing. *Eukaryotic cell*, **11**,  
584 1095-1103.
- 585 20. Ruiz-Garcia, A.B., Sendra, R., Galiana, M., Pamblanco, M., Perez-Ortin, J.E. and Tordera, V.  
586 (1998) HAT1 and HAT2 proteins are components of a yeast nuclear histone acetyltransferase  
587 enzyme specific for free histone H4. *The Journal of biological chemistry*, **273**, 12599-12605.
- 588 21. Verreault, A., Kaufman, P.D., Kobayashi, R. and Stillman, B. (1998) Nucleosomal DNA regulates  
589 the core-histone-binding subunit of the human Hat1 acetyltransferase. *Current biology : CB*, **8**, 96-  
590 108.
- 591 22. Lu, X.W. and Horvitz, H.R. (1998) *lin-35* and *lin-53*, two genes that antagonize a *C. elegans* Ras  
592 pathway, encode proteins similar to Rb and its binding protein RbAp48. *Cell*, **95**, 981-991.
- 593 23. Li, Y., Zhang, L., Liu, T., Chai, C., Fang, Q., Wu, H., Agudelo Garcia, P.A., Han, Z., Zong, S., Yu,  
594 Y. *et al.* (2014) Hat2p recognizes the histone H3 tail to specify the acetylation of the newly  
595 synthesized H3/H4 heterodimer by the Hat1p/Hat2p complex. *Genes & development*, **28**, 1217-  
596 1227.
- 597 24. Satrimafitrah, P., Barman, H.K., Ahmad, A., Nishitoh, H., Nakayama, T., Fukagawa, T. and  
598 Takami, Y. (2016) RbAp48 is essential for viability of vertebrate cells and plays a role in  
599 chromosome stability. *Chromosome research : an international journal on the molecular,*  
600 *supramolecular and evolutionary aspects of chromosome biology*, **24**, 161-173.



- 601 25. Campos, E.I., Fillingham, J., Li, G., Zheng, H., Voigt, P., Kuo, W.H., Seepany, H., Gao, Z., Day,  
602 L.A., Greenblatt, J.F. *et al.* (2010) The program for processing newly synthesized histones H3.1  
603 and H4. *Nature structural & molecular biology*, **17**, 1343-1351.
- 604 26. Maddox, P.S., Hyndman, F., Monen, J., Oegema, K. and Desai, A. (2007) Functional genomics  
605 identifies a Myb domain-containing protein family required for assembly of CENP-A chromatin.  
606 *The Journal of cell biology*, **176**, 757-763.
- 607 27. Lee, B.C., Lin, Z. and Yuen, K.W. (2016) RbAp46/48(LIN-53) Is Required for Holocentromere  
608 Assembly in *Caenorhabditis elegans*. *Cell reports*, **14**, 1819-1828.
- 609 28. Ohzeki, J., Shono, N., Otake, K., Martins, N.M., Kugou, K., Kimura, H., Nagase, T., Larionov, V.,  
610 Earnshaw, W.C. and Masumoto, H. (2016) KAT7/HBO1/MYST2 Regulates CENP-A Chromatin  
611 Assembly by Antagonizing Suv39h1-Mediated Centromere Inactivation. *Developmental cell*, **37**,  
612 413-427.
- 613 29. Han, S.M., Cottee, P.A. and Miller, M.A. (2010) Sperm and oocyte communication mechanisms  
614 controlling *C. elegans* fertility. *Dev Dyn*, **239**, 1265-1281.
- 615 30. Brauchle, M., Baumer, K. and Gonczy, P. (2003) Differential activation of the DNA replication  
616 checkpoint contributes to asynchrony of cell division in *C. elegans* embryos. *Current biology : CB*,  
617 **13**, 819-827.
- 618 31. Pourkarimi, E., Bellush, J.M. and Whitehouse, I. (2016) Spatiotemporal coupling and decoupling  
619 of gene transcription with DNA replication origins during embryogenesis in *C. elegans*. *Elife*, **5**.
- 620 32. Vijayraghavan, S. and Schwacha, A. (2012) The eukaryotic Mcm2-7 replicative helicase. *Subcell*  
621 *Biochem*, **62**, 113-134.
- 622 33. Bui, M., Dimitriadis, E.K., Hoischen, C., An, E., Quenet, D., Giebe, S., Nita-Lazar, A., Diekmann,  
623 S. and Dalal, Y. (2012) Cell-cycle-dependent structural transitions in the human CENP-A  
624 nucleosome in vivo. *Cell*, **150**, 317-326.
- 625 34. Gassmann, R., Rechtsteiner, A., Yuen, K.W., Muroyama, A., Egelhofer, T., Gaydos, L., Barron, F.,  
626 Maddox, P., Essex, A., Monen, J. *et al.* (2012) An inverse relationship to germline transcription  
627 defines centromeric chromatin in *C. elegans*. *Nature*, **484**, 534-537.
- 628 35. Wisniewski, J., Hajj, B., Chen, J.J., Mizuguchi, G., Xiao, H., Wei, D., Dahan, M. and Wu, C. (2014)  
629 Imaging the fate of histone Cse4 reveals de novo replacement in S phase and subsequent stable  
630 residence at centromeres. *Elife*, **3**.
- 631 36. Pearson, C.G., Yeh, E., Gardner, M., Odde, D., Salmon, E.D. and Bloom, K. (2004) Stable  
632 Kinetochore-Microtubule Attachment Constrains Centromere Positioning in Metaphase. **14**, 1962-  
633 1967.
- 634 37. Ono, T., Fang, Y., Spector, D.L. and Hirano, T. (2004) Spatial and temporal regulation of  
635 Condensins I and II in mitotic chromosome assembly in human cells. *Molecular biology of the cell*,  
636 **15**, 3296-3308.
- 637 38. Hori, T., Shang, W.H., Toyoda, A., Misu, S., Monma, N., Ikeo, K., Molina, O., Vargiu, G.,  
638 Fujiyama, A., Kimura, H. *et al.* (2014) Histone H4 Lys 20 monomethylation of the CENP-A  
639 nucleosome is essential for kinetochore assembly. *Developmental cell*, **29**, 740-749.

- 640 39. Sobel, R.E., Cook, R.G., Perry, C.A., Annunziato, A.T. and Allis, C.D. (1995) Conservation of  
641 deposition-related acetylation sites in newly synthesized histones H3 and H4. *Proceedings of the*  
642 *National Academy of Sciences of the United States of America*, **92**, 1237-1241.
- 643 40. Ohzeki, J., Bergmann, J.H., Kouprina, N., Noskov, V.N., Nakano, M., Kimura, H., Earnshaw,  
644 W.C., Larionov, V. and Masumoto, H. (2012) Breaking the HAC Barrier: histone H3K9  
645 acetyl/methyl balance regulates CENP-A assembly. *The EMBO journal*, **31**, 2391-2402.
- 646 41. Ejlassi-Lassalette, A., Mocquard, E., Arnaud, M.C. and Thiriet, C. (2011) H4 replication-  
647 dependent diacetylation and Hat1 promote S-phase chromatin assembly in vivo. *Molecular*  
648 *biology of the cell*, **22**, 245-255.
- 649 42. Murzina, N.V., Pei, X.Y., Zhang, W., Sparkes, M., Vicente-Garcia, J., Pratap, J.V., McLaughlin,  
650 S.H., Ben-Shahar, T.R., Verreault, A., Luisi, B.F. *et al.* (2008) Structural basis for the recognition  
651 of histone H4 by the histone-chaperone RbAp46. *Structure*, **16**, 1077-1085.
- 652 43. Boltengagen, M., Huang, A., Boltengagen, A., Tixl, L., Lindner, H., Kremser, L., Offterdinger, M.  
653 and Lusser, A. (2015) A novel role for the histone acetyltransferase Hat1 in the CENP-A/CID  
654 assembly pathway in *Drosophila melanogaster*. *Nucleic acids research*.
- 655 44. Nagarajan, P., Ge, Z., Sirbu, B., Doughty, C., Agudelo Garcia, P.A., Schleder, M., Annunziato,  
656 A.T., Cortez, D., Kenner, L. and Parthun, M.R. (2013) Histone acetyl transferase 1 is essential for  
657 mammalian development, genome stability, and the processing of newly synthesized histones H3  
658 and H4. *PLoS genetics*, **9**, e1003518.
- 659 45. Tagami, H., Ray-Gallet, D., Almouzni, G. and Nakatani, Y. (2004) Histone H3.1 and H3.3  
660 Complexes Mediate Nucleosome Assembly Pathways Dependent or Independent of DNA  
661 Synthesis. *Cell*, **116**, 51-61.
- 662 46. Ricketts, M.D., Dasgupta, N., Fan, J., Han, J., Gerace, M., Tang, Y., Black, B.E., Adams, P.D. and  
663 Marmorstein, R. (2019) The HIRA histone chaperone complex subunit UBN1 harbors H3/H4- and  
664 DNA-binding activity. *The Journal of biological chemistry*, **294**, 9239-9259.
- 665 47. Zhang, H., Han, J., Kang, B., Burgess, R. and Zhang, Z. (2012) Human Histone Acetyltransferase  
666 1 Protein Preferentially Acetylates H4 Histone Molecules in H3.1-H4 over H3.3-H4. **287**, 6573-  
667 6581.
- 668 48. Shang, W.H., Hori, T., Westhorpe, F.G., Godek, K.M., Toyoda, A., Misu, S., Monma, N., Ikeo, K.,  
669 Carroll, C.W., Takami, Y. *et al.* (2016) Acetylation of histone H4 lysine 5 and 12 is required for  
670 CENP-A deposition into centromeres. *Nature communications*, **7**, 13465.
- 671 49. Furuyama, T., Dalal, Y. and Henikoff, S. (2006) Chaperone-mediated assembly of centromeric  
672 chromatin in vitro. *Proceedings of the National Academy of Sciences of the United States of*  
673 *America*, **103**, 6172-6177.
- 674 50. An, S., Kim, H. and Cho, U.S. (2015) Mis16 Independently Recognizes Histone H4 and the  
675 CENP-ACnp1-Specific Chaperone Scm3sp. *J Mol Biol*, **427**, 3230-3240.
- 676 51. Yu, Z., Zhou, X., Wang, W., Deng, W., Fang, J., Hu, H., Wang, Z., Li, S., Cui, L., Shen, J. *et al.*  
677 (2015) Dynamic phosphorylation of CENP-A at Ser68 orchestrates its cell-cycle-dependent  
678 deposition at centromeres. *Developmental cell*, **32**, 68-81.

- 679 52. Furuyama, T. and Henikoff, S. (2006) Biotin-tag affinity purification of a centromeric nucleosome  
680 assembly complex. *Cell cycle*, **5**, 1269-1274.
- 681 53. Bobkov, G.O.M., Gilbert, N. and Heun, P. (2018) Centromere transcription allows CENP-A to  
682 transit from chromatin association to stable incorporation. *The Journal of cell biology*.
- 683 54. Subramanian, L., Toda, N.R., Rappsilber, J. and Allshire, R.C. (2014) Eic1 links Mis18 with the  
684 CCAN/Mis6/Ctf19 complex to promote CENP-A assembly. *Open biology*, **4**, 140043.
- 685 55. Hayashi, T., Ebe, M., Nagao, K., Kokubu, A., Sajiki, K. and Yanagida, M. (2014)  
686 *Schizosaccharomyces pombe* centromere protein Mis19 links Mis16 and Mis18 to recruit CENP-A  
687 through interacting with NMD factors and the SWI/SNF complex. *Genes Cells*, **19**, 541-554.
- 688 56. Nardi, I.K., Zasadzinska, E., Stellfox, M.E., Knippler, C.M. and Foltz, D.R. (2016) Licensing of  
689 Centromeric Chromatin Assembly through the Mis18alpha-Mis18beta Heterotetramer. *Molecular*  
690 *cell*, **61**, 774-787.
- 691 57. Wang, J., Liu, X., Dou, Z., Chen, L., Jiang, H., Fu, C., Fu, G., Liu, D., Zhang, J., Zhu, T. *et al.*  
692 (2014) Mitotic regulator Mis18beta interacts with and specifies the centromeric assembly of  
693 molecular chaperone holliday junction recognition protein (HJURP). *The Journal of biological*  
694 *chemistry*, **289**, 8326-8336.
- 695 58. Barnhart, M.C., Kuich, P.H., Stellfox, M.E., Ward, J.A., Bassett, E.A., Black, B.E. and Foltz, D.R.  
696 (2011) HJURP is a CENP-A chromatin assembly factor sufficient to form a functional de novo  
697 kinetochore. *The Journal of cell biology*, **194**, 229-243.
- 698 59. Fachinetti, D., Logsdon, G.A., Abdullah, A., Selzer, E.B., Cleveland, D.W. and Black, B.E. (2017)  
699 CENP-A Modifications on Ser68 and Lys124 Are Dispensable for Establishment, Maintenance,  
700 and Long-Term Function of Human Centromeres. **40**, 104-113.
- 701 60. Suter, B., Pogoutse, O., Guo, X., Krogan, N., Lewis, P., Greenblatt, J.F., Rine, J. and Emili, A.  
702 (2007) Association with the origin recognition complex suggests a novel role for histone  
703 acetyltransferase Hat1p/Hat2p. **5**, 38.
- 704 61. Van Hooser, A.A., Ouspenski, I., Gregson, H.C., Starr, D.A., Yen, T.J., Goldberg, M.L., Yokomori,  
705 K., Earnshaw, W.C., Sullivan, K.F. and Brinkley, B.R. (2001) Specification of kinetochore-forming  
706 chromatin by the histone H3 variant CENP-A. *Journal of cell science*, **114**, 3529-3542.
- 707 62. Bailey, A.O., Panchenko, T., Shabanowitz, J., Lehman, S.M., Bai, D.L., Hunt, D.F., Black, B.E.  
708 and Foltz, D.R. (2015) Identification of the posttranslational modifications present in centromeric  
709 chromatin. *Molecular & cellular proteomics : MCP*.
- 710 63. Hayashi, T., Fujita, Y., Iwasaki, O., Adachi, Y., Takahashi, K. and Yanagida, M. (2004) Mis16 and  
711 Mis18 are required for CENP-A loading and histone deacetylation at centromeres. *Cell*, **118**, 715-  
712 729.
- 713 64. Li, Q., Zhou, H., Wurtele, H., Davies, B., Horazdovsky, B., Verreault, A. and Zhang, Z. (2008)  
714 Acetylation of histone H3 lysine 56 regulates replication-coupled nucleosome assembly. *Cell*, **134**,  
715 244-255.
- 716 65. Barski, A., Cuddapah, S., Cui, K., Roh, T.Y., Schones, D.E., Wang, Z., Wei, G., Chepelev, I. and  
717 Zhao, K. (2007) High-resolution profiling of histone methylations in the human genome. *Cell*, **129**,  
718 823-837.

- 719 66. Greer, E.L., Beese-Sims, S.E., Brookes, E., Spadafora, R., Zhu, Y., Rothbart, S.B., Aristizabal-  
720 Corrales, D., Chen, S., Badeaux, A.I., Jin, Q. *et al.* (2014) A Histone Methylation Network  
721 Regulates Transgenerational Epigenetic Memory in *C. elegans*. *Cell reports*.
- 722 67. Greer, E.L., Maures, T.J., Hauswirth, A.G., Green, E.M., Leeman, D.S., Maro, G.S., Han, S.,  
723 Banko, M.R., Gozani, O. and Brunet, A. (2010) Members of the H3K4 trimethylation complex  
724 regulate lifespan in a germline-dependent manner in *C. elegans*. *Nature*, **466**, 383-387.
- 725 68. Bessler, J.B., Andersen, E.C. and Villeneuve, A.M. (2010) Differential localization and  
726 independent acquisition of the H3K9me2 and H3K9me3 chromatin modifications in the  
727 *Caenorhabditis elegans* adult germ line. *PLoS genetics*, **6**, e1000830.

728

729

730 **TABLE AND FIGURES LEGENDS**

731 Table 1. Summary of the profile of histone PTMs on newly formed ACs in one-cell embryos.

| CENP-A and histone PTMs | Signal intensity on newly formed ACs* | Function in Centromere                                      | Associated histone modifiers or factors               | Reference on function and associated factors |
|-------------------------|---------------------------------------|-------------------------------------------------------------|-------------------------------------------------------|----------------------------------------------|
| CENP-A <sup>HCP-3</sup> | ++                                    | Epigenetic mark of centromere                               | M18BP1 <sup>KNL-2</sup> & RbAp46/48 <sup>LIN-53</sup> | (61)                                         |
| H4K20me                 | +++                                   | CENP-A nucleosome                                           | SET-1 (18)                                            | (38,62)                                      |
| H4K5ac                  | +++                                   | Newly synthesized histone H4                                | RbAp46/48 <sup>LIN-53</sup> & HAT-1                   | (48,63)                                      |
| H4K12ac                 | +++                                   | Newly synthesized histone H4                                | RbAp46/48 <sup>LIN-53</sup> & HAT-1                   | (48,63)                                      |
| H3K9ac                  | +++                                   | Newly synthesized histones/ open chromatin marker           | RbAp46/48 <sup>LIN-53</sup> , HAT-1 & unknown factors | (40)                                         |
| H3K56ac                 | +                                     | Newly synthesized histones deposited during DNA replication | MCM-2 & ASF-1                                         | (11,64)                                      |
| H3K4me                  | +                                     | Permissive transcription                                    | SET-17                                                | (65,66)                                      |
| H3K4me2                 | -                                     | Active transcription                                        | SET-17 & SET-30                                       | (66)                                         |
| H3K4me3                 | -                                     | Robust transcription                                        | ASH-2                                                 | (67)                                         |
| H3K9me2                 | -                                     | Heterochromatin mark                                        | MET-2                                                 | (68)                                         |
| H3K9me3                 | -                                     | Heterochromatin mark                                        | MES-2                                                 | (68)                                         |
| H3K27me3                | -                                     | Heterochromatin mark                                        | MES-2                                                 | (65)                                         |

732 +++: signal on ACs is significantly higher than that on endogenous chromosomes

733 ++: signal on ACs is comparable to that on endogenous chromosomes

734 +: signal on ACs is significantly lower than that on endogenous chromosomes

735 -: signal on ACs is undetectable

736

737 Figure 1. Chromatinization and *de novo* CENP-A<sup>HCP-3</sup> formation on foreign HMW DNA arrays to form  
 738 artificial chromosomes (ACs) in fertilized one-cell embryos. (A) A schematic diagram of delivering  
 739 short, linearized p64xLacO plasmid (L64xLacO) DNA into *C. elegans* gonad by microinjection. DAPI  
 740 stained six condensed bivalent endogenous chromosomes and the HMW DNA arrays  
 741 concatemerized from the injected foreign DNA. Representative immunofluorescence images of the  
 742 H2B::mCherry and of CENP-A<sup>HCP-3</sup> on bivalent chromosomes in oocytes with multiple DAPI foci.  
 743 Yellow arrowheads indicate the HMW foreign DNA arrays. Scale bar represents 10  $\mu$ m. (B)  
 744 Representative immunofluorescence images show that nascent artificial chromosomes (ACs)  
 745 assembled from the HMW DNA arrays contain detectable CENP-A<sup>HCP-3</sup> signals in one-cell embryos at  
 746 meiosis I and II, respectively. White dash ovals show the paternal and maternal DNA, and \*

747 represents the polar body. Scale bar represents 5  $\mu\text{m}$ . A higher-magnification view of the  
748 representative ACs (white square) is shown on the right, in which the scale bar represents 2  $\mu\text{m}$  for  
749 the magnified images. (C) Time-lapse images following an AC, which was attempting to segregate  
750 during the first mitosis in one-cell embryos. The time-lapse after fertilization was shown (mm:ss).  
751 Scale bar represents 5  $\mu\text{m}$ .

752 Figure 2. Impaired DNA replication causes centromere disorganization on ACs and anaphase  
753 bridges. (A & B) Immunofluorescence staining of ACs (Lacl), inner kinetochore proteins, CENP-A<sup>HCP-3</sup>  
754 (A) or M18BP1<sup>KNL-2</sup> (B), and chromatin (DAPI) at metaphase and anaphase in one-cell embryos. The  
755 line-scan analysis shows the signal intensity of CENP-A<sup>HCP-3</sup> and M18BP1<sup>KNL-2</sup>, respectively, on the  
756 metaphase plate of ACs and endogenous chromosomes. Scale bar represents 5  $\mu\text{m}$ . A 3- $\mu\text{m}$  line was  
757 drawn across the metaphase plate in the high magnification panels, and the signal intensities were  
758 measured (Yellow line: AC; White line: Endogenous chromosomes). Scale bar in magnified panels  
759 represents 2  $\mu\text{m}$ . The plot shows signal intensities from each channel along the line. Green line: Lacl;  
760 Red line: CENP-A<sup>HCP-3</sup> (A) or M18BP1<sup>KNL-2</sup> (B); Blue line: DAPI. The black arrowheads indicate the  
761 poleward orientation of CENP-A<sup>HCP-3</sup> on endogenous chromosomes. CENP-A<sup>HCP-3</sup> on the AC lacks  
762 such bi-orientation at metaphase. (C) EdU staining of nascent ACs in one-cell embryos at interphase,  
763 prophase and telophase, respectively, and ACs in a multi-cell embryo. (D) Comparison of the average  
764 uptake of EdU after 15 minutes of incubation (normalized to DAPI) on endogenous chromosomes and  
765 nascent ACs in mitotic one-cell and multi-cell embryos, respectively. All ACs or endogenous  
766 chromosomes in one-cell or multi-cell embryos were pooled together (n = number of samples) for  
767 calculating the mean of EdU integrated density. The bar chart shows the mean EdU signal on ACs  
768 relative to that on endogenous chromosomes. The error bars represent standard deviation (SD).  
769 Significant differences are analyzed by the Student t-test (\*\*, p < 0.01; NS, not significant). (E)  
770 Immunofluorescence of CENP-A<sup>HCP-3</sup> on ACs in untreated wild-type (WT) or *mcm-2* RNAi-treated one-  
771 and multi-cell stage embryos during prometaphase. Scale bar represents 2  $\mu\text{m}$ . CENP-A<sup>HCP-3</sup> on the  
772 entire AC is described as “disorganized”, while CENP-A<sup>HCP-3</sup> on the poleward sides of the AC is  
773 described as “bi-oriented”. (F) A scatter plot shows the quantification of integrated density of CENP-  
774 A<sup>HCP-3</sup> signal on ACs in WT and in *mcm-2* RNAi-treated one-cell embryos. The error bars represent  
775 standard deviation (SD). Significant differences are analyzed by the Student t-test (NS, not  
776 significant). (G) Quantification of the percentage of ACs with disorganized or bi-oriented CENP-A<sup>HCP-3</sup>  
777 on AC in one- and multi-cell stage WT or *mcm-2* RNAi-treated embryos. The number of ACs (n)  
778 analyzed was indicated. Significant differences are analyzed by the Fisher’s exact test (\*\*, p < 0.01).

779 Figure 3. Depletion of condensin II subunit, SMC-4, reduces *de novo* CENP-A<sup>HCP-3</sup> deposition on ACs.  
780 Immunofluorescence of CENP-A<sup>HCP-3</sup> on ACs in WT and *smc-4* RNAi-treated one-cell embryos.  
781 Embryos were stained with antibodies against Lacl (green), CENP-A<sup>HCP-3</sup> (red) and DAPI (blue). Scale  
782 bar represents 5  $\mu\text{m}$ . A higher-magnification view of the ACs (white square) is shown on the right.  
783 Scale bar represents 2  $\mu\text{m}$  for the magnified images. A scatter plot shows the quantification of  
784 normalized integrated density of CENP-A<sup>HCP-3</sup> signal on ACs in WT and *smc-4* RNAi-treated one-cell  
785 embryos. The integrated density was normalized with that of DAPI. The number of samples (n)

786 analyzed was indicated. The number of samples (n) analyzed was indicated. The error bars represent  
787 SD. Significant differences are analyzed by the Student's t-test, \*\*, p < 0.01.

788 Figure 4. Profiling of histone post-translational modifications (PTMs) on nascent ACs in one-cell  
789 embryos by immunofluorescence (IF) staining. (A) Representative immunofluorescence images of  
790 H4K5ac, H4K12ac, H3K9ac, H4K20me, H3K4me, H3K4me2, H3K4me3, H3K56ac, H3K9me2,  
791 H3K9me3 and H3K27me3 on endogenous chromosomes and newly formed ACs in one-cell embryos.  
792 Embryos were stained with antibody against Lacl (green), antibodies against a histone PTM (red) and  
793 DAPI (blue). Scale bar represents 5  $\mu$ m. A higher-magnification view of the ACs (white square) is  
794 shown on the right. Scale bar represents 2  $\mu$ m for the magnified images. The representative images  
795 were contrast adjusted. The box plot shows the quantification result of the normalized integrated  
796 density of (B) H4K5ac; (C) H4K12ac; (D) H3K9ac; or (E) H4K20me signal on endogenous  
797 chromosomes and on ACs in one-cell embryos. Only quantifications of the enriched PTMs are shown.  
798 Other PTM levels are shown in Table 1. For quantification of PTMs on ACs and endogenous  
799 chromosomes, the signal density of each PTM was normalized with that of DAPI. The number of  
800 samples (n) analyzed was indicated. The error bars represent SD. Significant differences are  
801 analyzed by the Student t-test (\*, p < 0.05; \*\*, p < 0.01).

802 Figure 5. The segregation ability of nascent ACs and the enrichment of H4K5ac, H4K12ac and  
803 H3K9ac on ACs depend on RbAp46/48<sup>LIN-53</sup> and HAT-1. (A) A schematic diagram of the experimental  
804 approach used to identify factors responsible for AC segregation by RNAi and live-cell imaging. (B)  
805 Representative live-cell imaging of a nascent AC that was attempting to segregate (even with  
806 anaphase bridges) in WT (untreated) and in *lin-53* RNAi-treated one-cell embryos. The time-lapse  
807 between the images was shown (mm:ss). Scale bar represents 5  $\mu$ m. The same method was used for  
808 screening potential factors that affect the segregation rate of nascent ACs in one-cell embryos. (C)  
809 Quantification of AC segregation rates in WT (untreated), *hat-1*, *mys-1*, *mys-2*, *cbp-1*, *lin-53*, *hda-1*,  
810 *set-1*, *hat-1 mys-1* double, *hat-1 mys-2* double, *mys-1 mys-2* double, *hat-1 lin-53* double, *mys-4 lsy-12*  
811 double and *hat-1 mys-1 mys-2* triple RNAi-treated one-cell embryos. Significant differences are  
812 analyzed by the Fisher's exact test (\*, p < 0.05; \*\*, p < 0.01). The number of samples (n) analyzed  
813 was indicated. Immunofluorescence of (D) H4K5ac, (E) H4K12ac and (F) H3K9ac on ACs in WT, *lin-*  
814 *53* RNAi-treated and *lin-53 hat-1* double RNAi-treated one-cell embryos. Embryos were stained with  
815 antibody against Lacl (green), antibodies against a histone PTM (red) and DAPI (blue). A higher-  
816 magnification view of the ACs (white square) is shown on the right. Scale bar represents 2  $\mu$ m for the  
817 magnified images. Scatter plots show the quantification of normalized integrated density of (D)  
818 H4K5ac, (E) H4K12ac and (F) H3K9ac on ACs. The integrated density of each PTM was normalized  
819 to DAPI. The number of samples (n) analyzed was indicated. The error bars represent SD.  
820 Significant differences are analyzed by student's t-test (\*\*, p < 0.01).

821 Figure 6. HAT-1 assists RbAp46/48<sup>LIN-53</sup> in *de novo* CENP-A<sup>HCP-3</sup> deposition on nascent ACs. (A)  
822 Immunofluorescence of CENP-A<sup>HCP-3</sup> on ACs in WT, *hat-1* RNAi, *lin-53*, *lin-53 hat-1* double and *knl-2*  
823 RNAi-treated one-cell embryos. A higher-magnification view of the ACs (white square) is shown on  
824 the right. Scale bars in whole embryo images and in the magnified images represent 5  $\mu$ m and 2  $\mu$ m,

825 respectively. Scatter plot shows the quantification result of the normalized integrated density of  
826 CENP-A<sup>HCP-3</sup> signal on ACs in (B) *hat-1*, (C) *lin-53*, (D) *lin-53 hat-1* double and (E) *knl-2* RNAi-treated  
827 one-cell embryos, which were compared with that in WT embryos. For (B)-(E), the integrated density  
828 of CENP-A<sup>HCP-3</sup> was normalized to DAPI. The number of samples (n) analyzed was indicated. The  
829 error bars represent SD. Significant differences are analyzed by the student's t-test (\*\*, p < 0.01).

830 Figure 7. RbAp46/48<sup>LIN-53</sup>-initiated *de novo* CENP-A<sup>HCP-3</sup> deposition is required for Mis18BP1<sup>KNL-2</sup>  
831 localization. (A) Immunofluorescence of M18BP1<sup>KNL-2</sup> on ACs in WT, *lin-53*, *hcp-3* and *mys-1 mys-2*  
832 double RNAi-treated one-cell embryos. A higher-magnification view of the ACs (white square) is  
833 shown on the right. Scale bars in whole embryo images and in the magnified images represent 5 μm  
834 and 2 μm, respectively. A scatter plot shows the quantification result of the normalized integrated  
835 density of M18BP1<sup>KNL-2</sup> signal on ACs in (B) *lin-53*, (C) *hcp-3* and *mys-1 mys-2* double RNAi-treated  
836 one-cell embryos, which were compared with that in WT embryos. For (B) and (C), the integrated  
837 density of M18BP1<sup>KNL-2</sup> was normalized to DAPI. The number of samples (n) analyzed was indicated.  
838 The error bars represent SD. Significant differences are analyzed by the student's t-test (\*\*, p<0.01;  
839 \*\*\*, p<0.001)).

840 Figure 8. A schematic diagram of the *de novo* centromere formation in *C. elegans* embryos. (A) A  
841 schematic diagram of the centromeric localization dependency in *C. elegans* endogenous  
842 chromosomes and in *de novo* centromere formation on ACs. A→B means B's localization is  
843 dependent on A, but not the other way around. Gray arrows indicate findings from other studies. Red  
844 arrows indicate the findings from this study. Bold arrows indicate that the effects are very severe. The  
845 line between two factors indicates that they have physical interaction. (B) The proposed process of  
846 artificial chromosome formation in *C. elegans* gonad. 1. Firstly, small foreign DNA fragments from  
847 microinjection concatemerizes into HMW DNA arrays in the oocyte cells. RbAp46/48<sup>LIN-53</sup>-HAT-1  
848 complex acetylates H3-H4 and CENP-A-H4 pre-nucleosomes at H4K5, H4K12 and H3K9, which  
849 contributes to the hyperacetylation of nascent ACs. 2. Secondly, RbAp46/48<sup>LIN-53</sup> initiates *de novo*  
850 CENP-A<sup>HCP-3</sup> and H3 deposition, and RbAp46/48<sup>LIN-53</sup> is required for M18BP1<sup>KNL-2</sup> localization on  
851 HMW DNA; Condensin II complex also facilitates CENP-A<sup>HCP-3</sup> deposition. Chromatinization and  
852 centromerization of the HMW DNA generates nascent ACs. Nascent ACs have DNA replication  
853 defects and lack bi-oriented sister kinetochores, which could lead to merotelic attachments to the  
854 mitotic spindle and chromosome bridging (in early embryonic cells). 3. Finally, DNA replication  
855 efficiency gradually improves on ACs, and ACs "mature" by late embryonic cell stage. In matured  
856 ACs, bi-oriented sister kinetochores allow amphitelic attachment of spindles and proper segregation.

857



# Figure 1

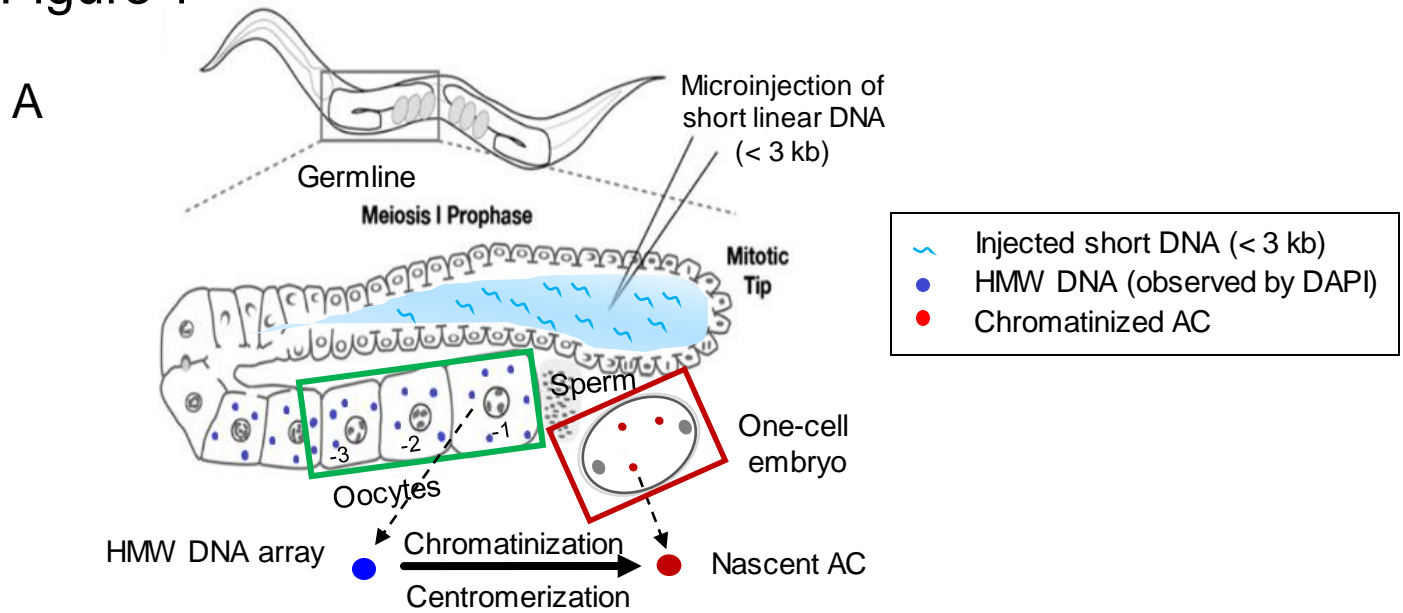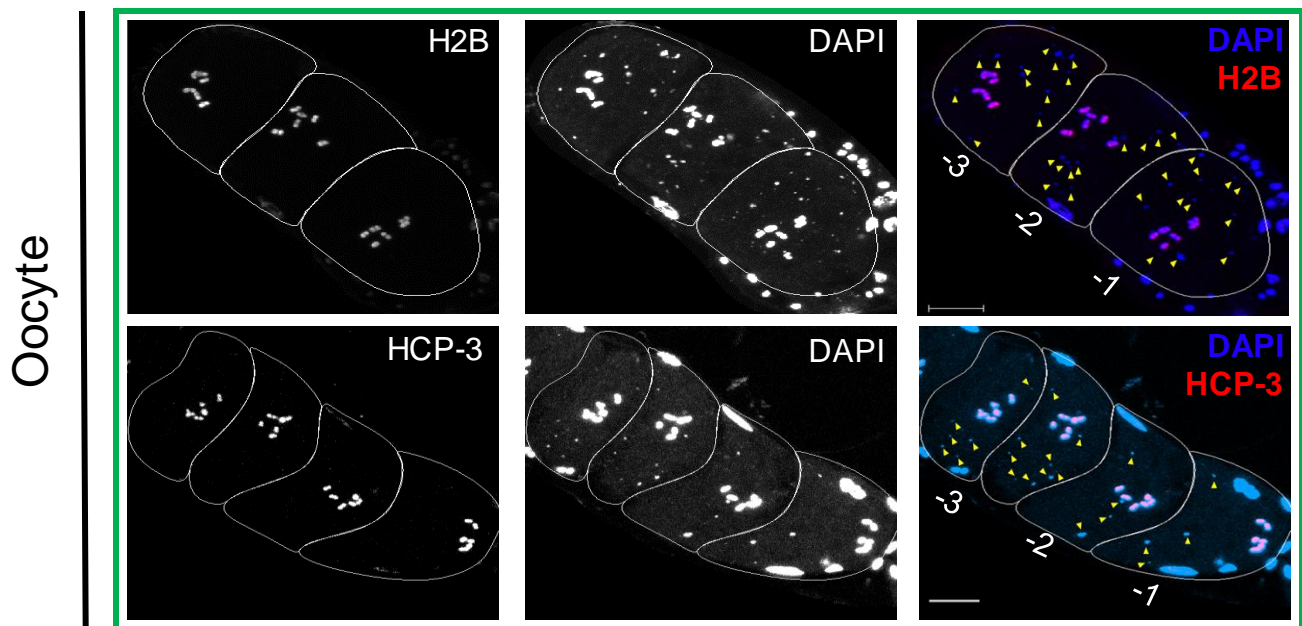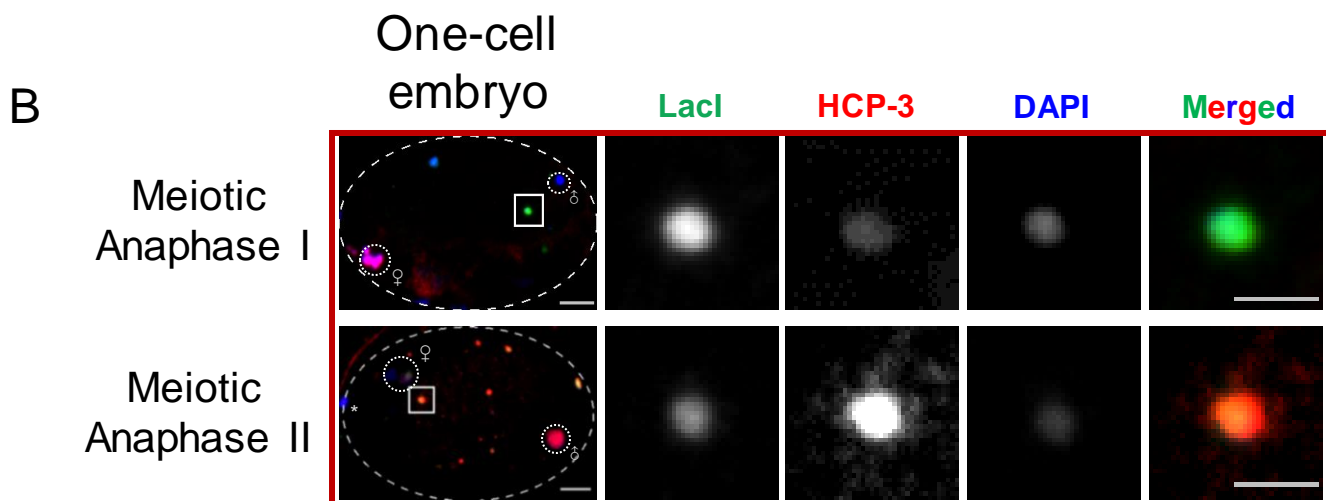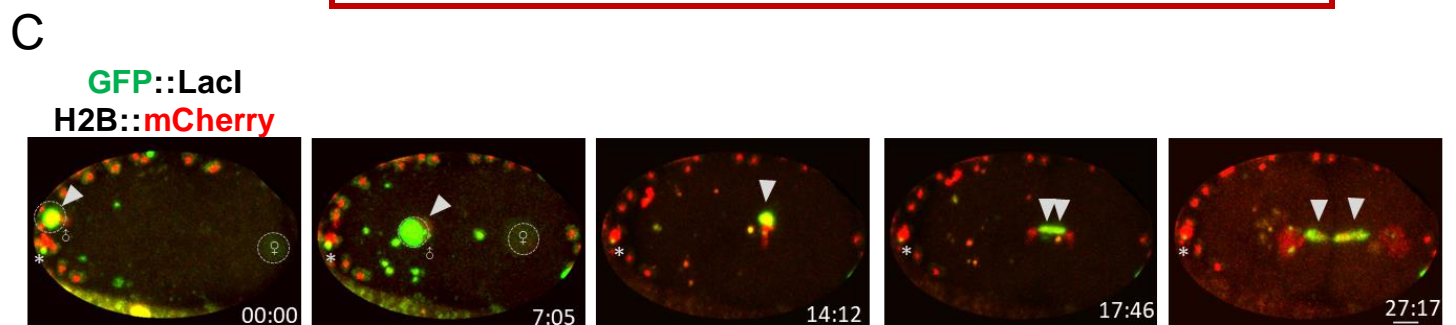

## Figure 2

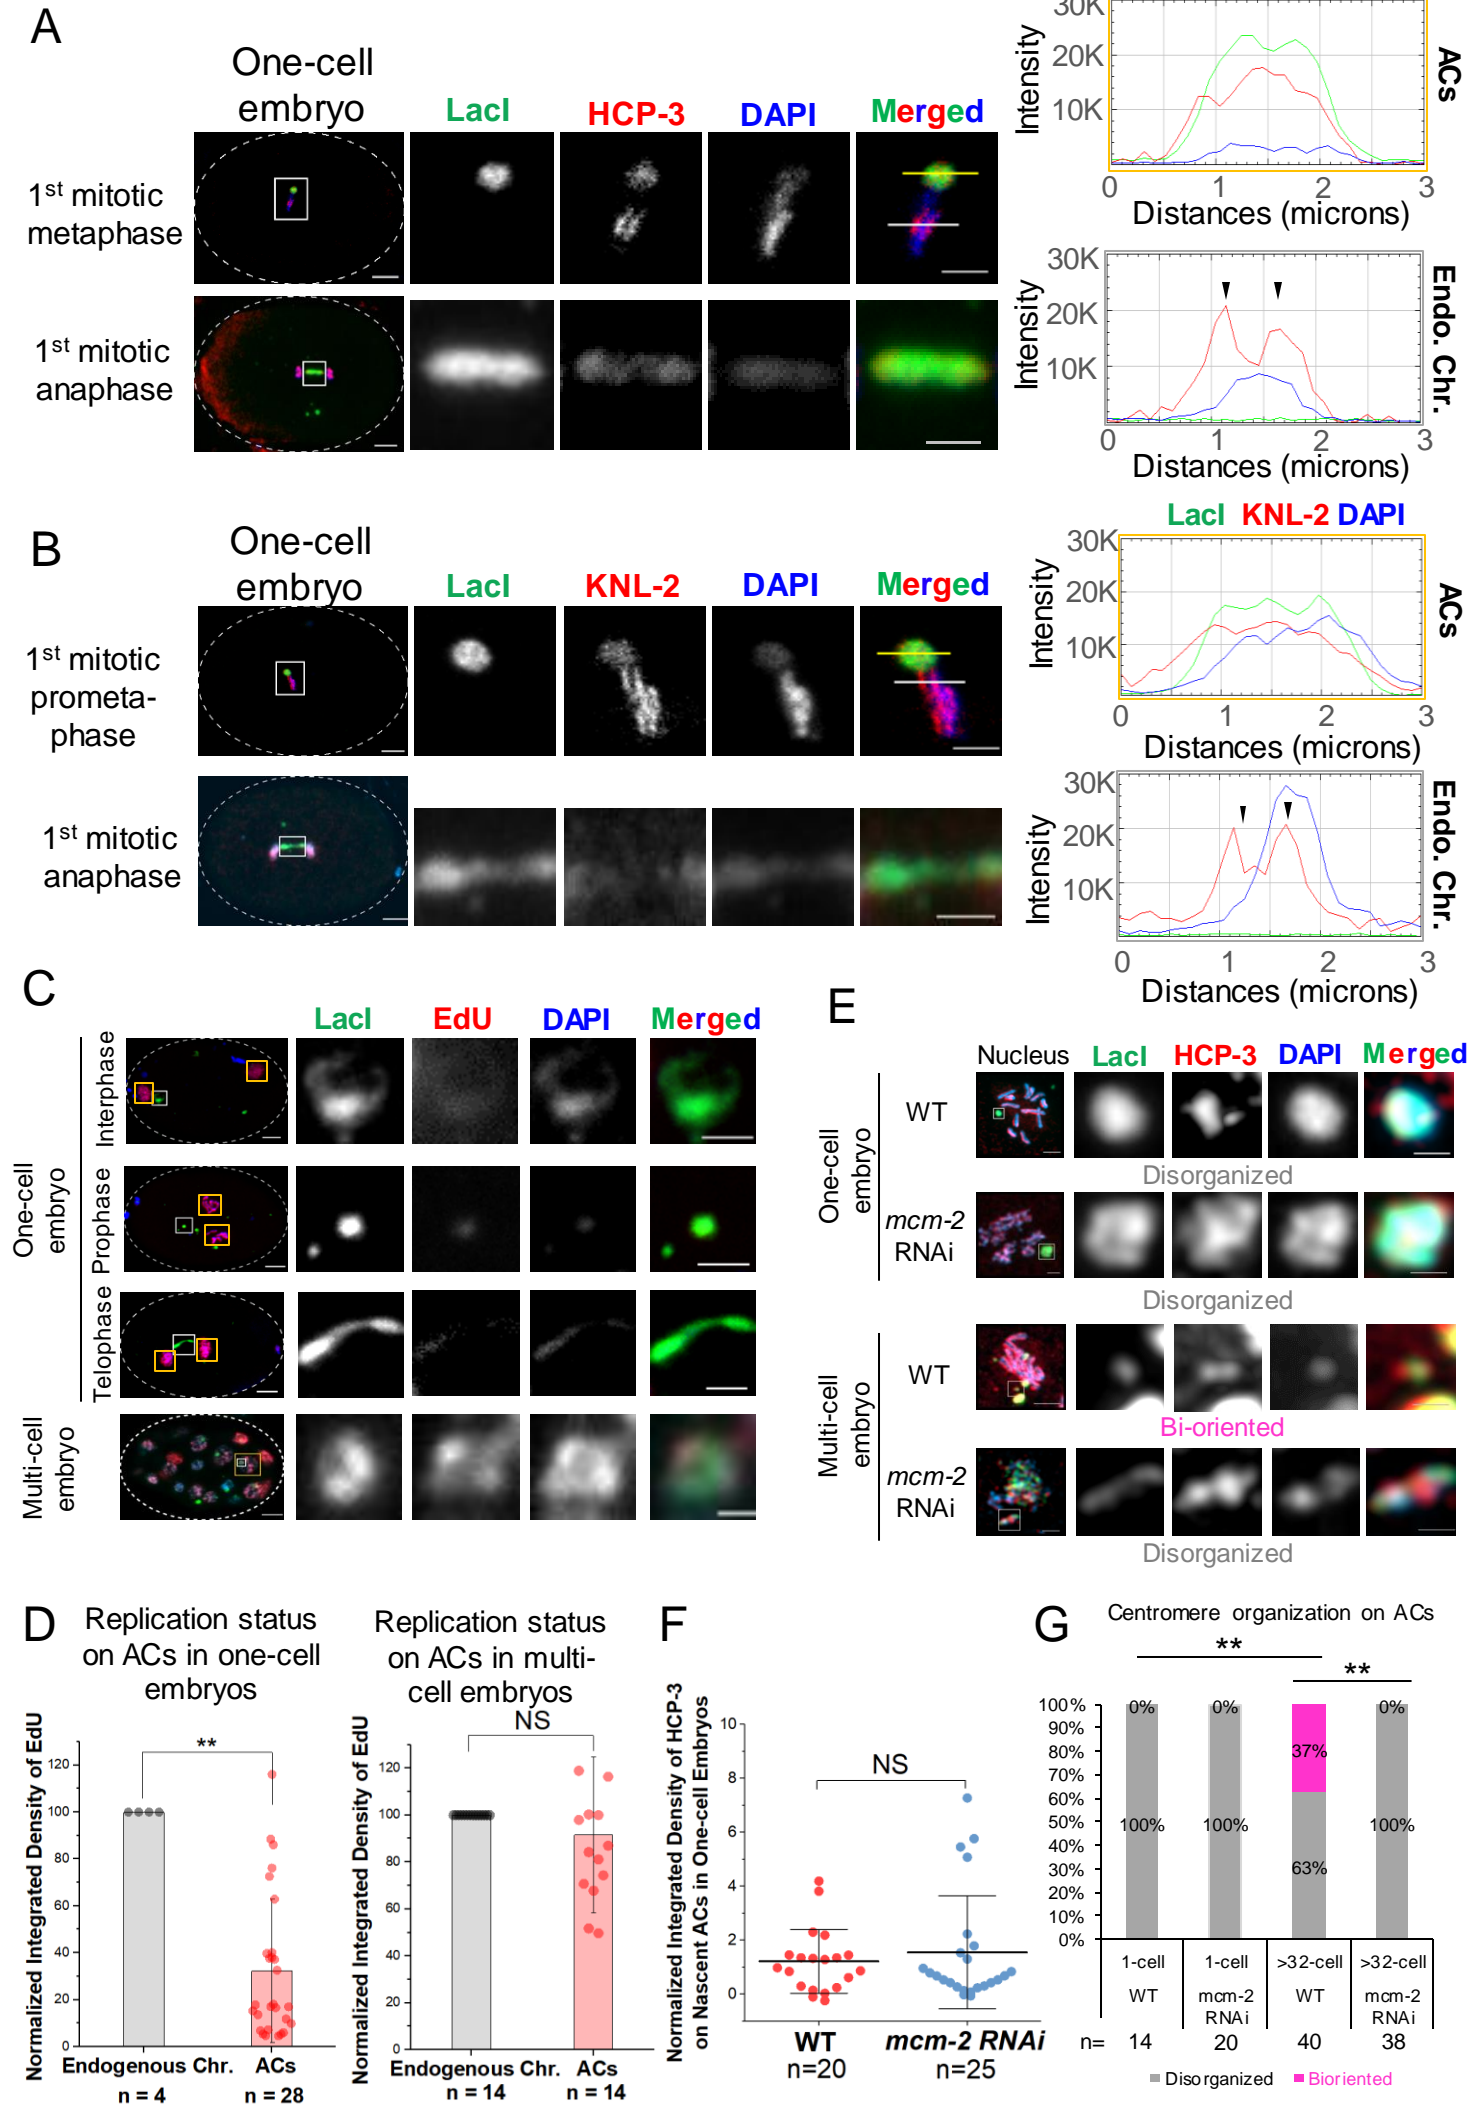

## Figure 3

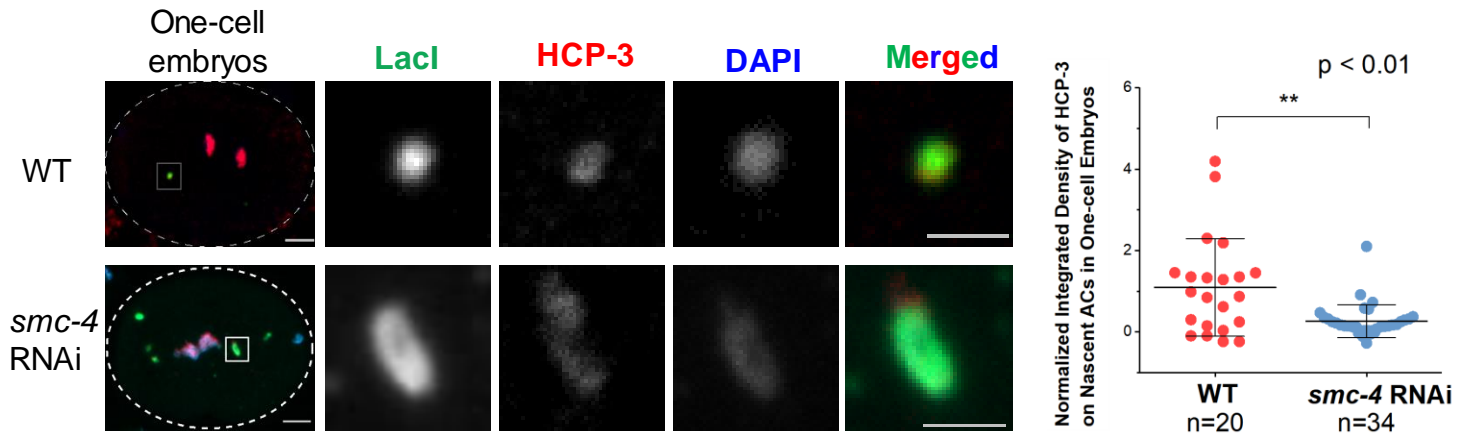

# Figure 4

A

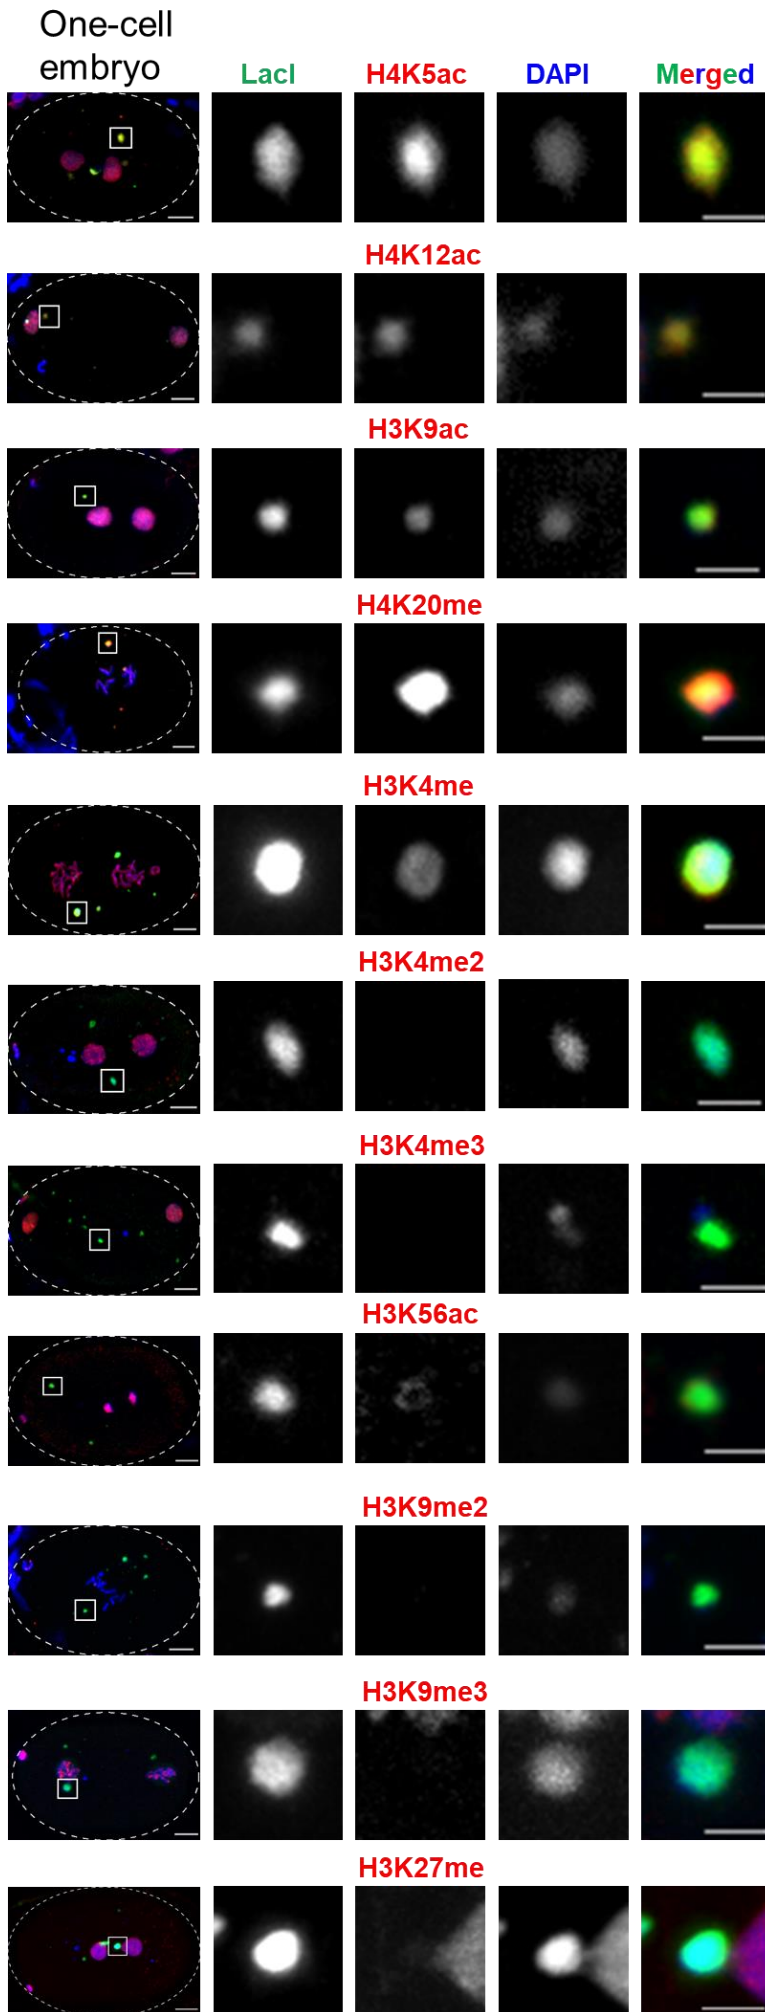

B

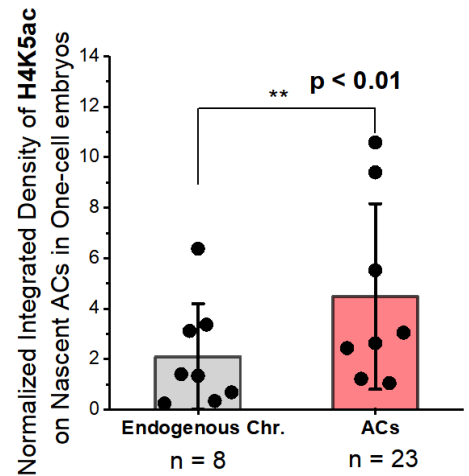

C

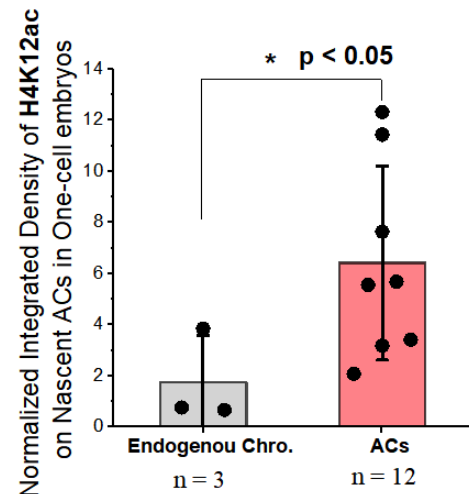

D

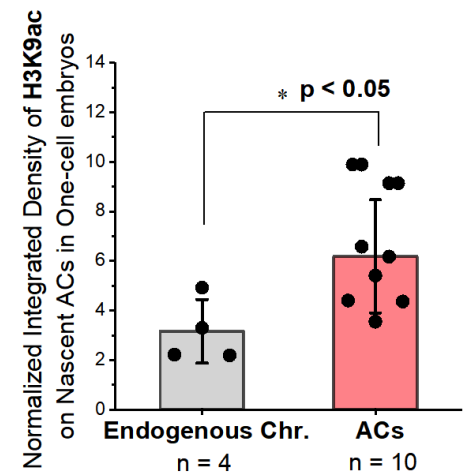

E

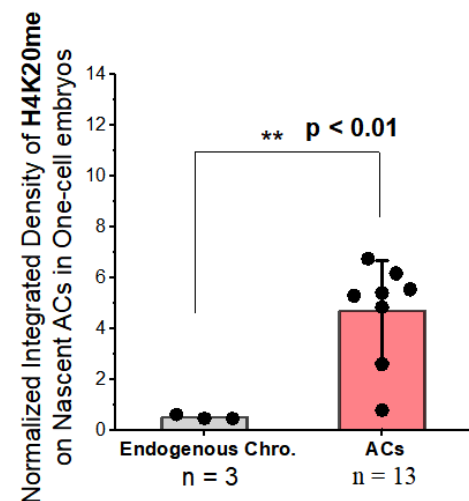

# Figure 5

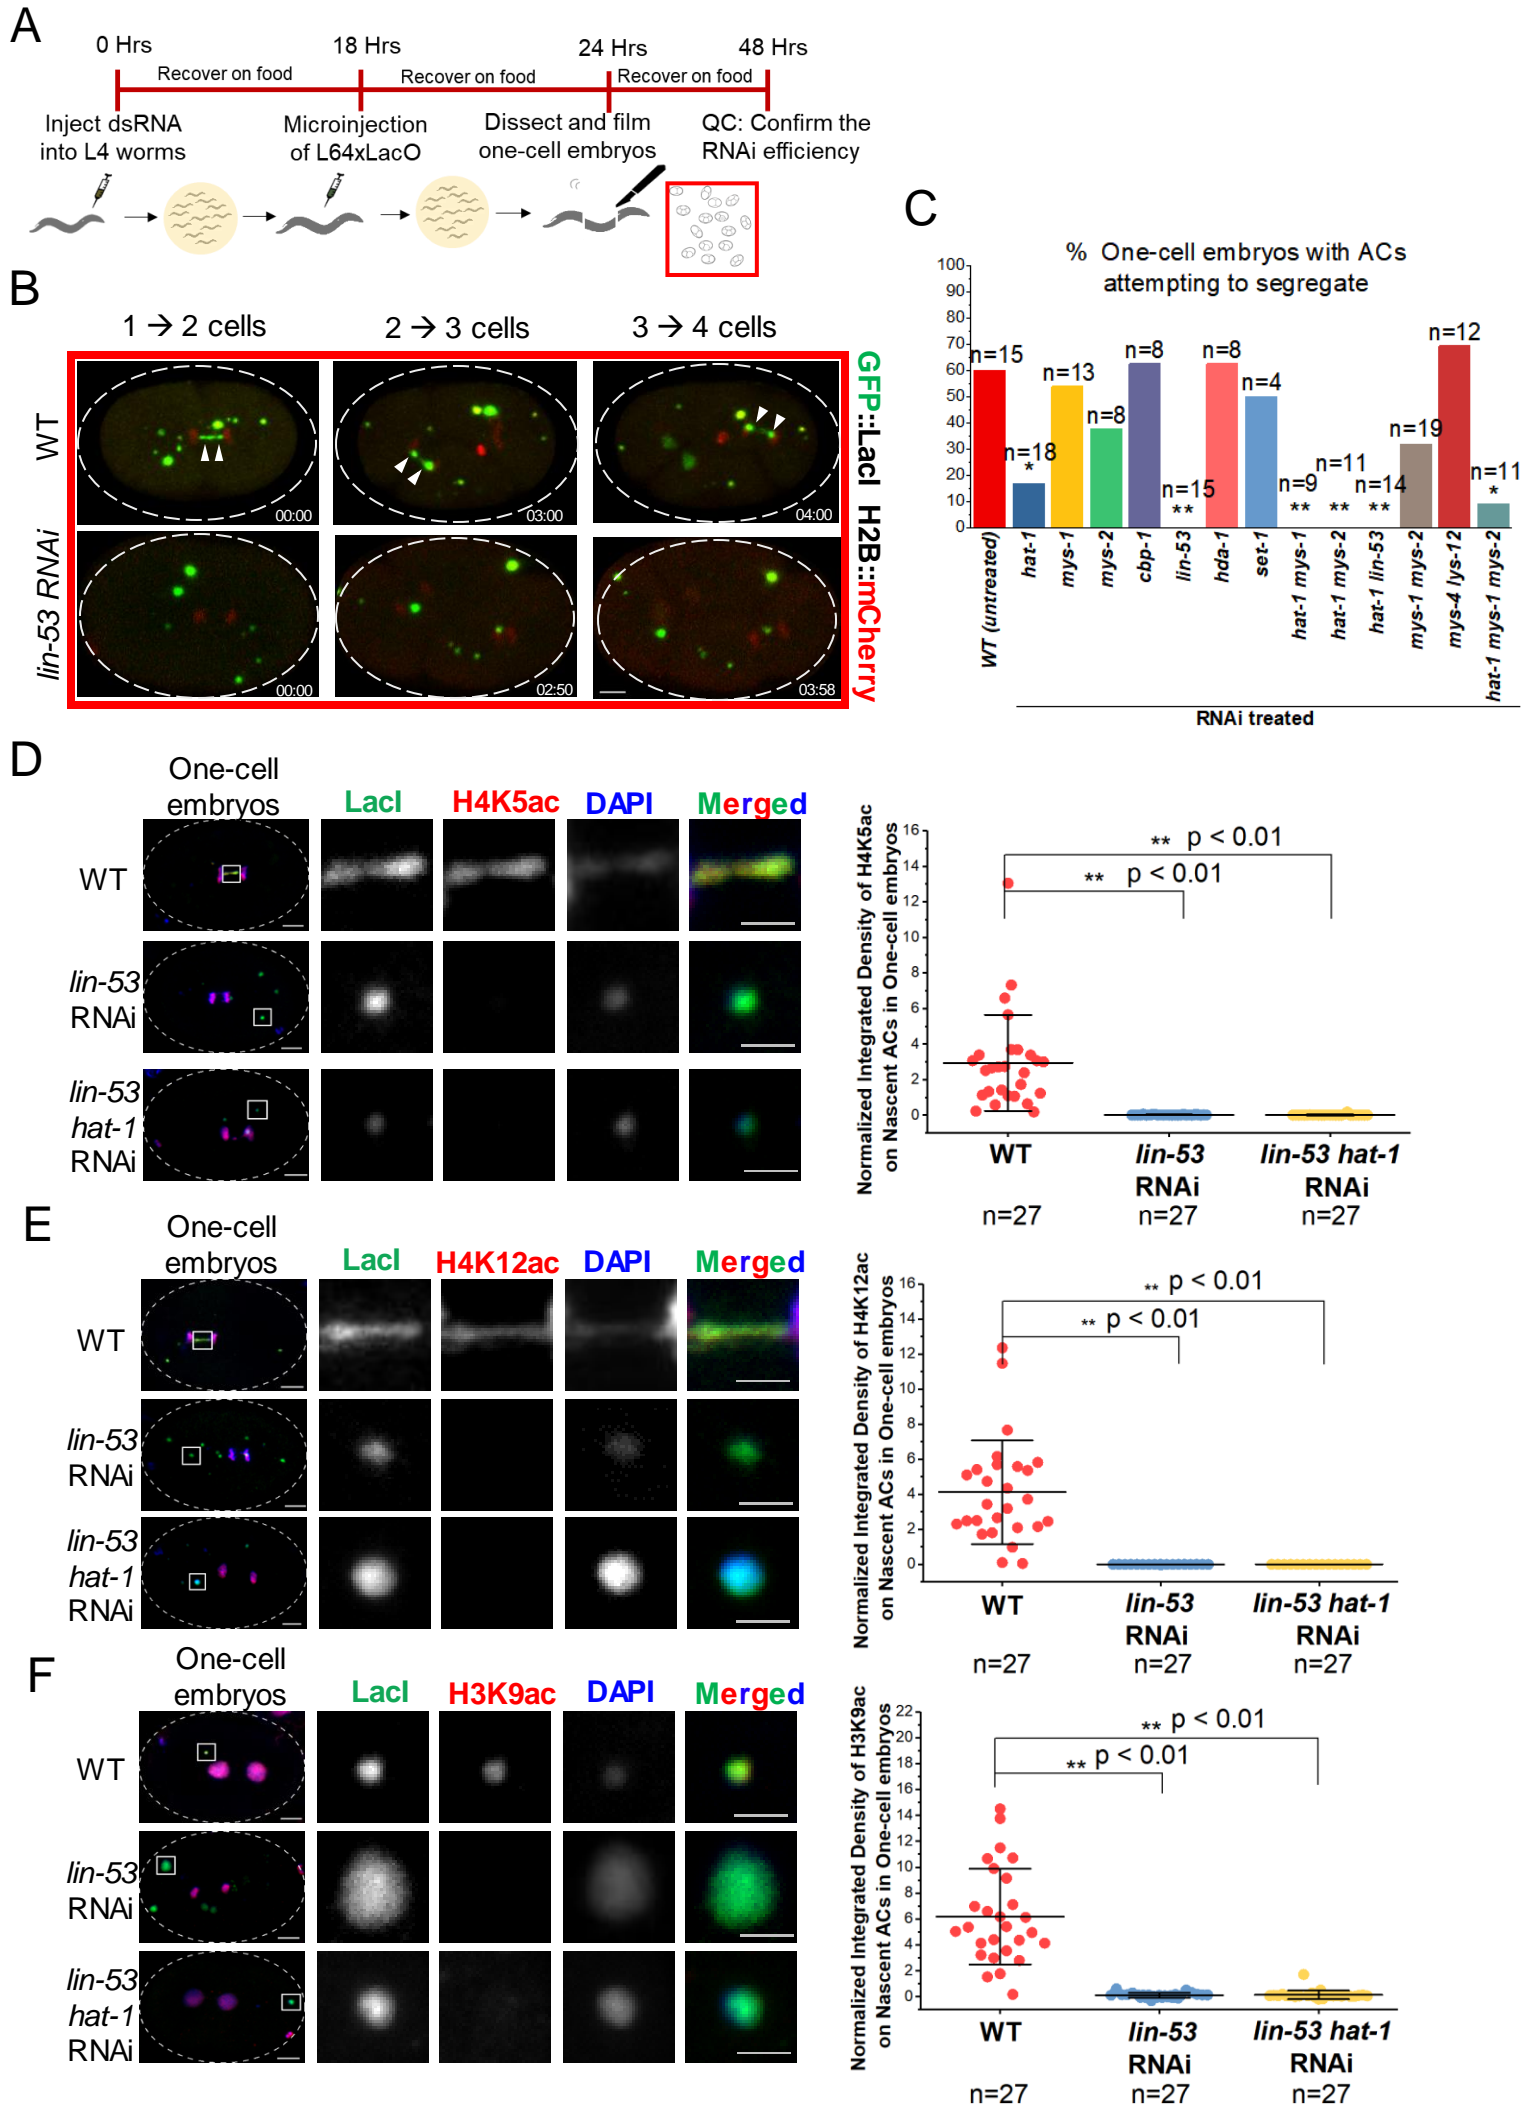

## Figure 6

A

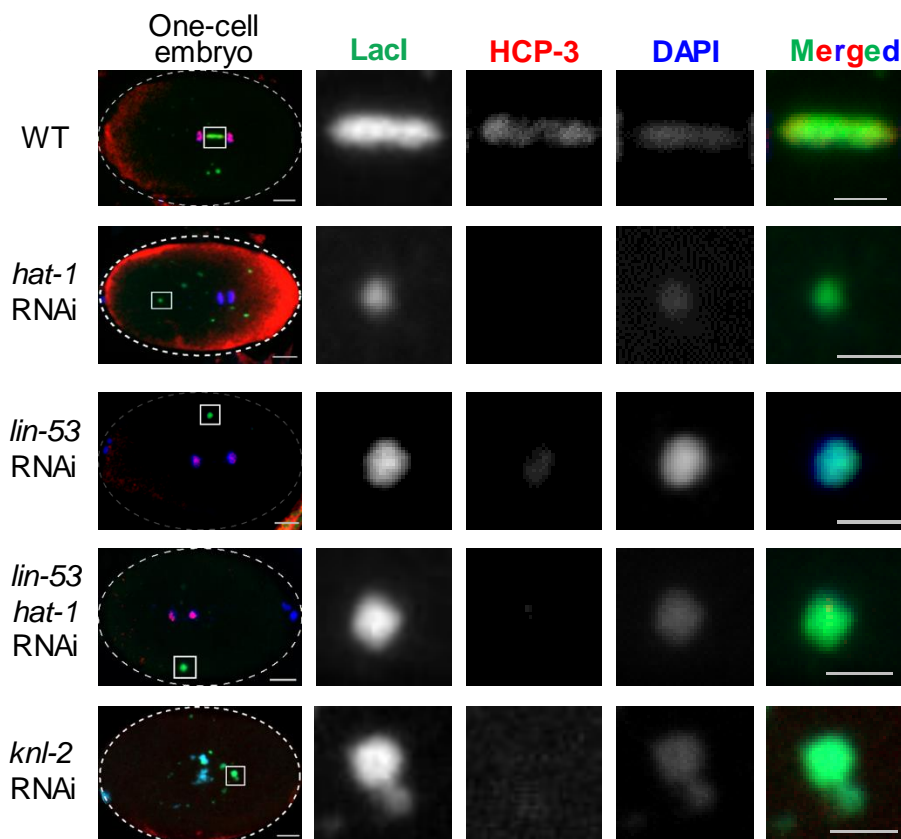

B

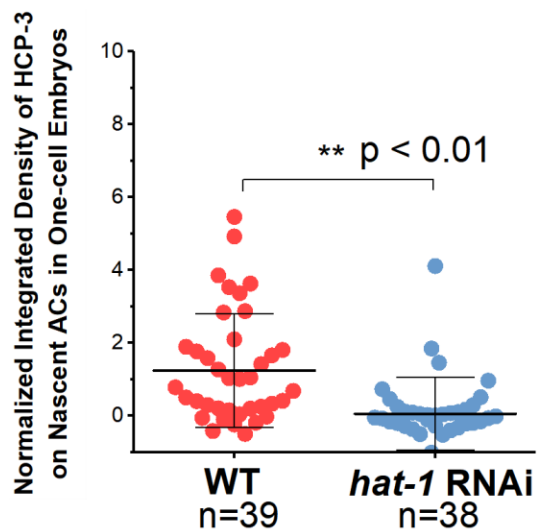

C

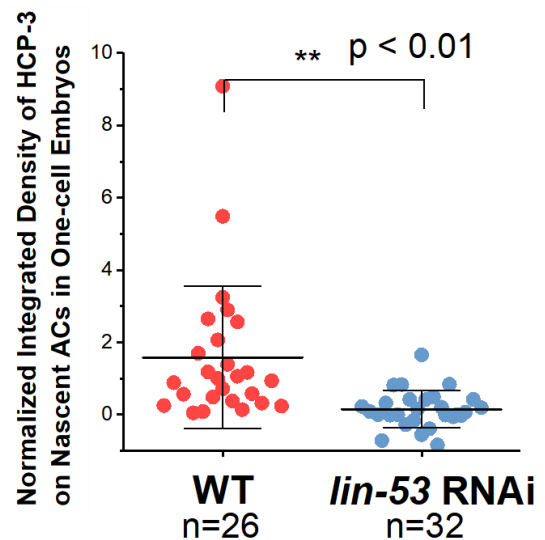

D

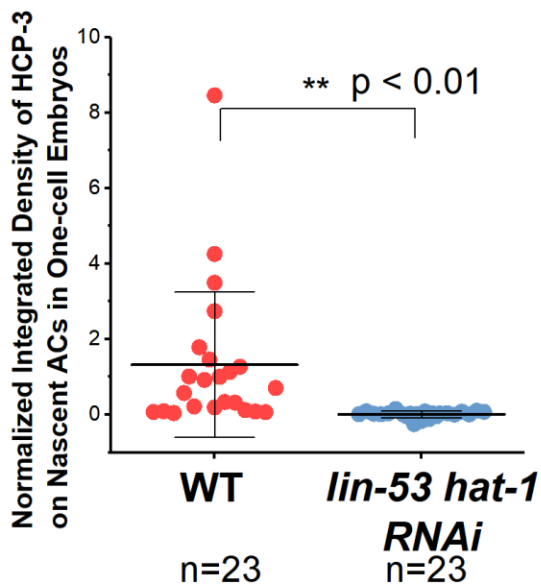

E

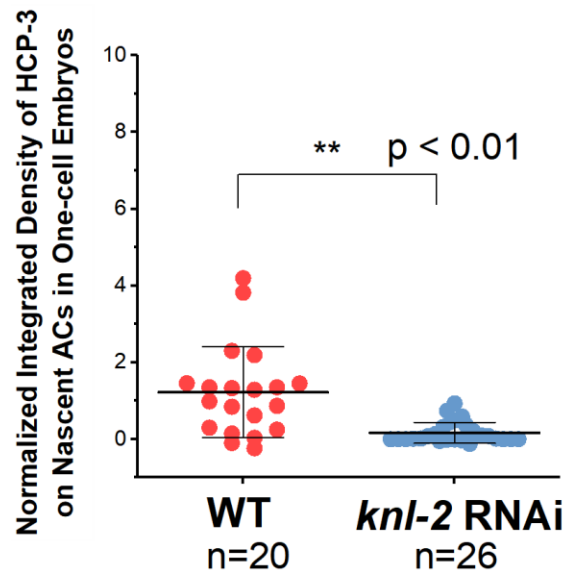

# Figure 7

A

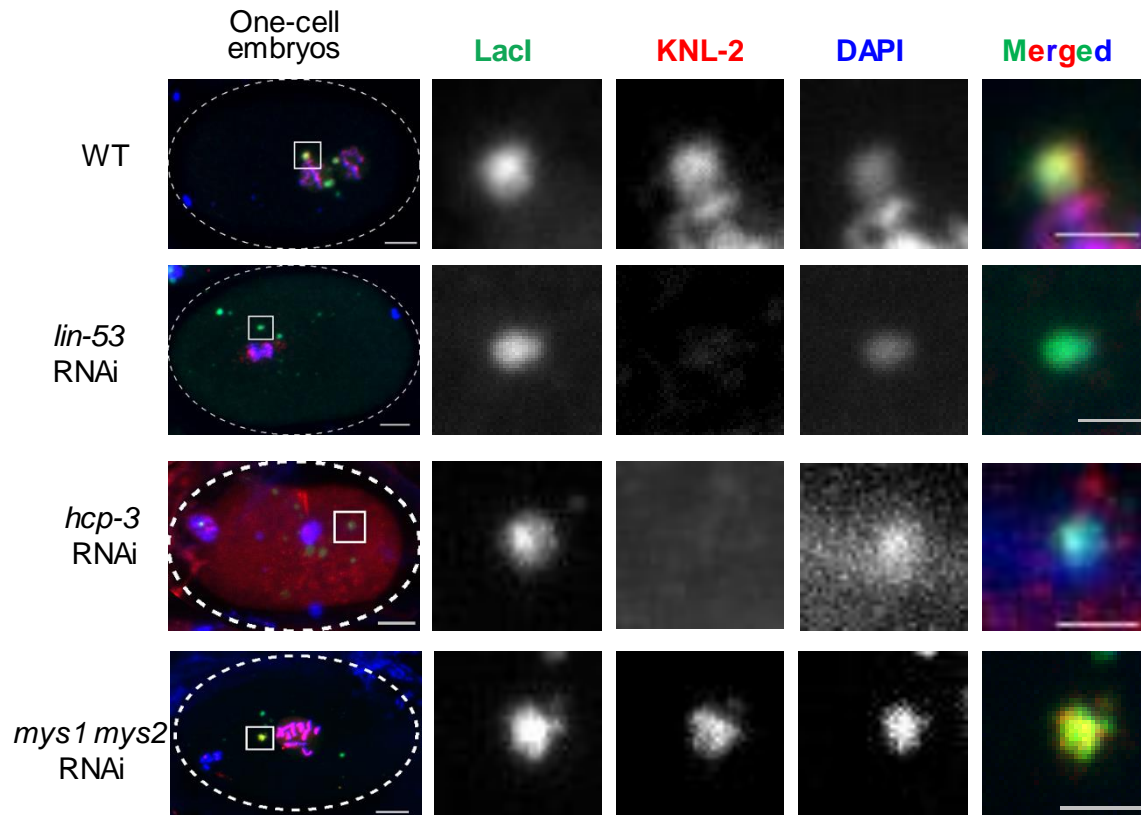

B

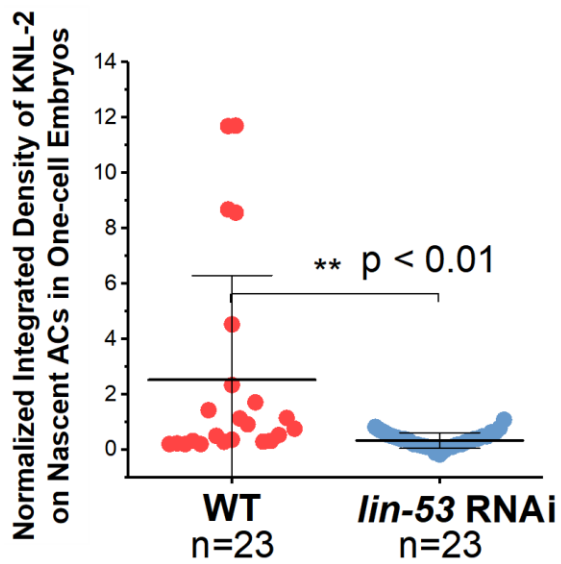

C

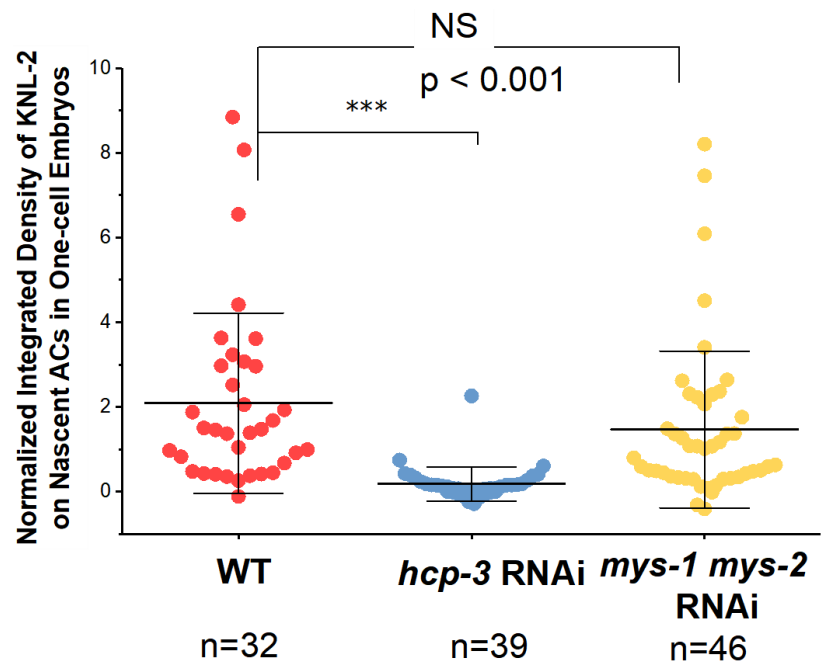

## Figure 8

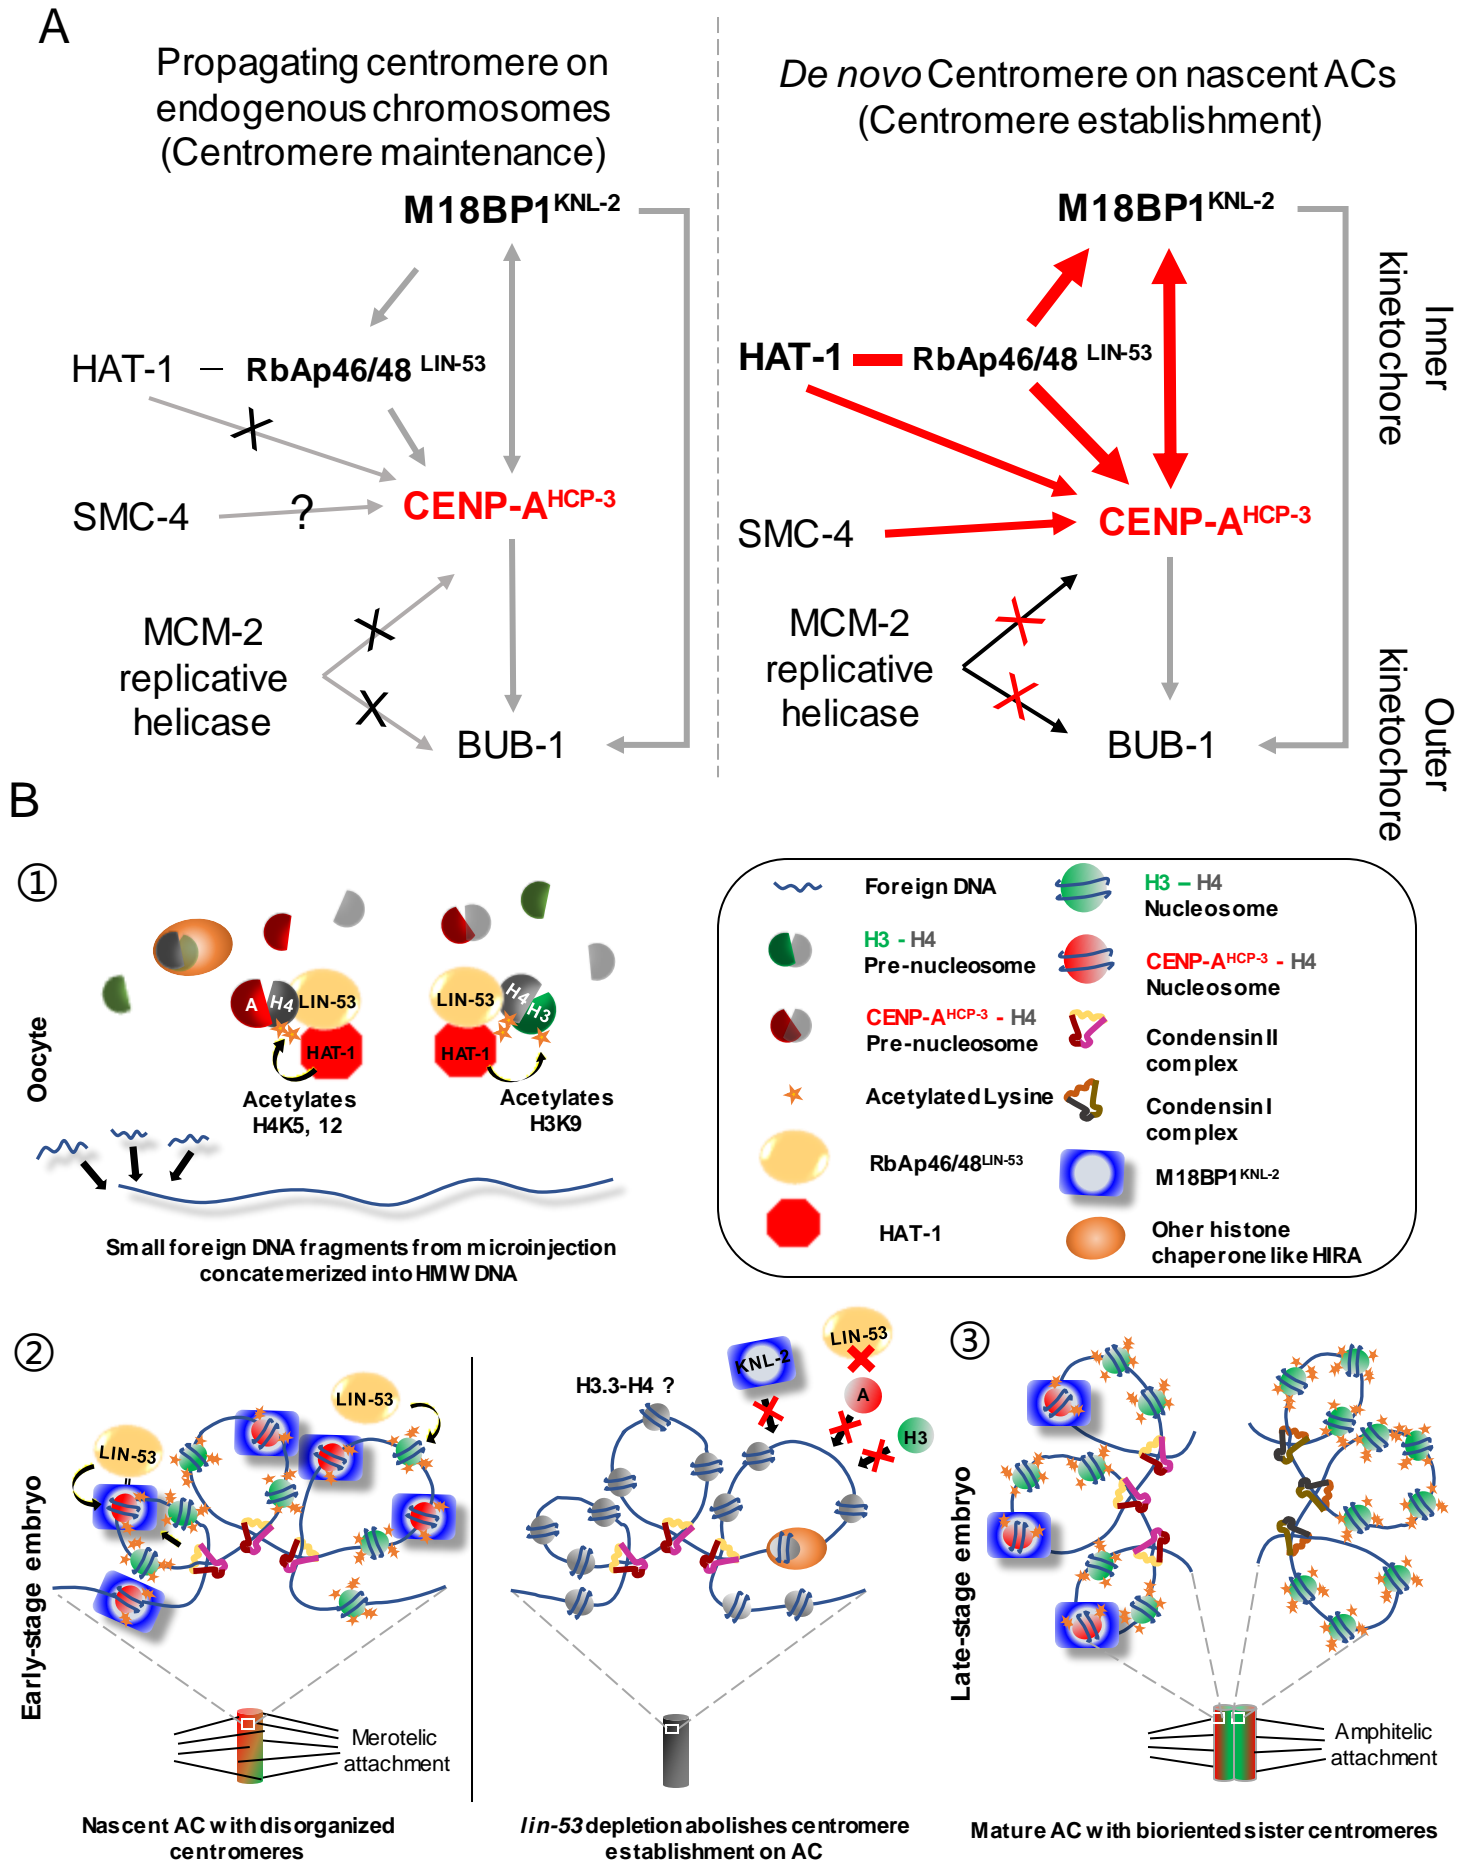

Source: https://www.biorxiv.org/content/10.1101/2020.04.12.019257v1.full.pdf
